# Supplementary material
Source: PubMed Central journal article supplement (PMC10758250)
Supplement: NIHMS1954509-supplement-Thames_GlycoCAP_supplement.pdf [file NIHMS1954509-supplement-Thames_GlycoCAP_supplement.pdf]

## Supplementary Data

### **GlycoCAP: A cell-free, bacterial glycosylation platform for building clickable azido-sialoglycoproteins**

Ariel Helms Thames,<sup>1,2,3,4</sup> Sam J. Moons,<sup>5</sup> Derek A. Wong,<sup>2,6</sup> Thomas J. Boltje,<sup>7</sup>  
Bruce S. Bochner,<sup>1,4</sup> Michael C. Jewett<sup>1,2,3,6,8,\*</sup>

<sup>1</sup>Medical Scientist Training Program, Northwestern University Feinberg School of Medicine, Chicago, IL 60611, USA

<sup>2</sup>Center for Synthetic Biology, Northwestern University, 2145 Sheridan Road, Tech B486, Evanston, IL 60208, USA

<sup>3</sup>Interdisciplinary Biological Sciences Program, Northwestern University, Evanston, IL 60208, USA

<sup>4</sup>Division of Allergy and Immunology, Department of Medicine, Northwestern University Feinberg School of Medicine, Chicago, Illinois

<sup>5</sup>Synvenio B.V., Mercator 3, 6525ED Nijmegen, the Netherlands

<sup>6</sup>Department of Chemical and Biological Engineering, Northwestern University, 2145 Sheridan Rd, Evanston, IL 60208, USA

<sup>7</sup>Institute for Molecules and Materials, Radboud University Nijmegen, 6525AJ Nijmegen, the Netherlands

<sup>8</sup>Simpson Querrey Institute, Northwestern University, Chicago, IL 60611, USA

\*Correspondence: Michael C. Jewett, Department of Chemical and Biological Engineering, Northwestern University, Technical Institute E136, 2145 Sheridan Road, Evanston, IL 60208, USA; E-mail addresses: m-jewett@northwestern.edu; Tel: 1 847 467 5007; Fax: 1 847 491 3728

**Supplementary Figures 1-5**

**Supplementary Tables 1-5**

## Supplementary Figures

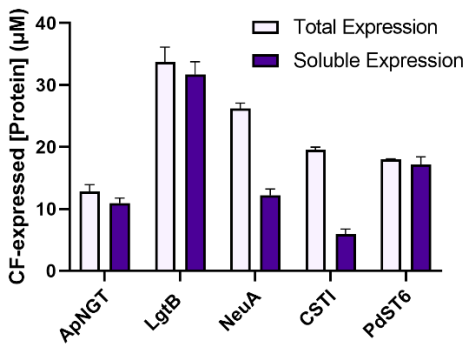

**Figure S1. Total and soluble cell-free expression of pathway enzymes.** Total and soluble expression of each enzyme is quantified by incorporation of radioactive [ $^{14}\text{C}$ ]-leucine (n=3; error bars = standard deviation). ApNGT, LgtB, and PdST6 demonstrate a high degree of relative soluble expression to total expression, where NeuA and CSTI have a lesser degree of relative soluble expression. Only the soluble portion is assembled into *in vitro* glycosylation reactions and all pathway enzymes have sufficient solubility and activity for the GlycoCAP platform.

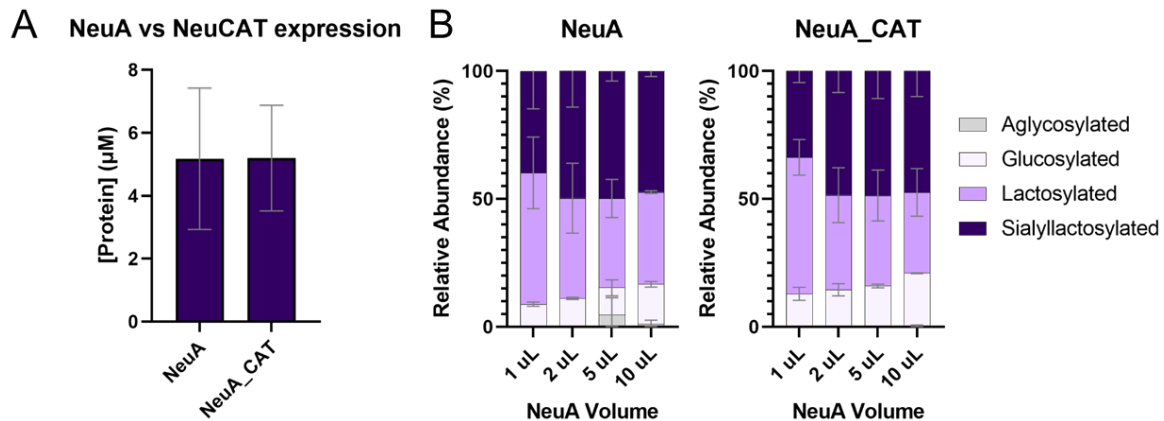

**Figure S2. NeuA DNA expression and glycosylation with and without a CAT linker.** NeuA was designed with and without a 5' CAT linker nucleotide sequence, which is often used to improve expression. **(A)** Both versions of NeuA expressed similarly as determined by incorporation of radioactive [<sup>14</sup>C]-leucine (n=3; error bars = standard deviation). **(B)** Both versions of NeuA also led to similar glycosylation efficiencies at equivalent titration volumes (n=2; errors bars = average error). Therefore, the CAT linker is not necessary to optimize NeuA expression and function in the GlycoCAP platform.

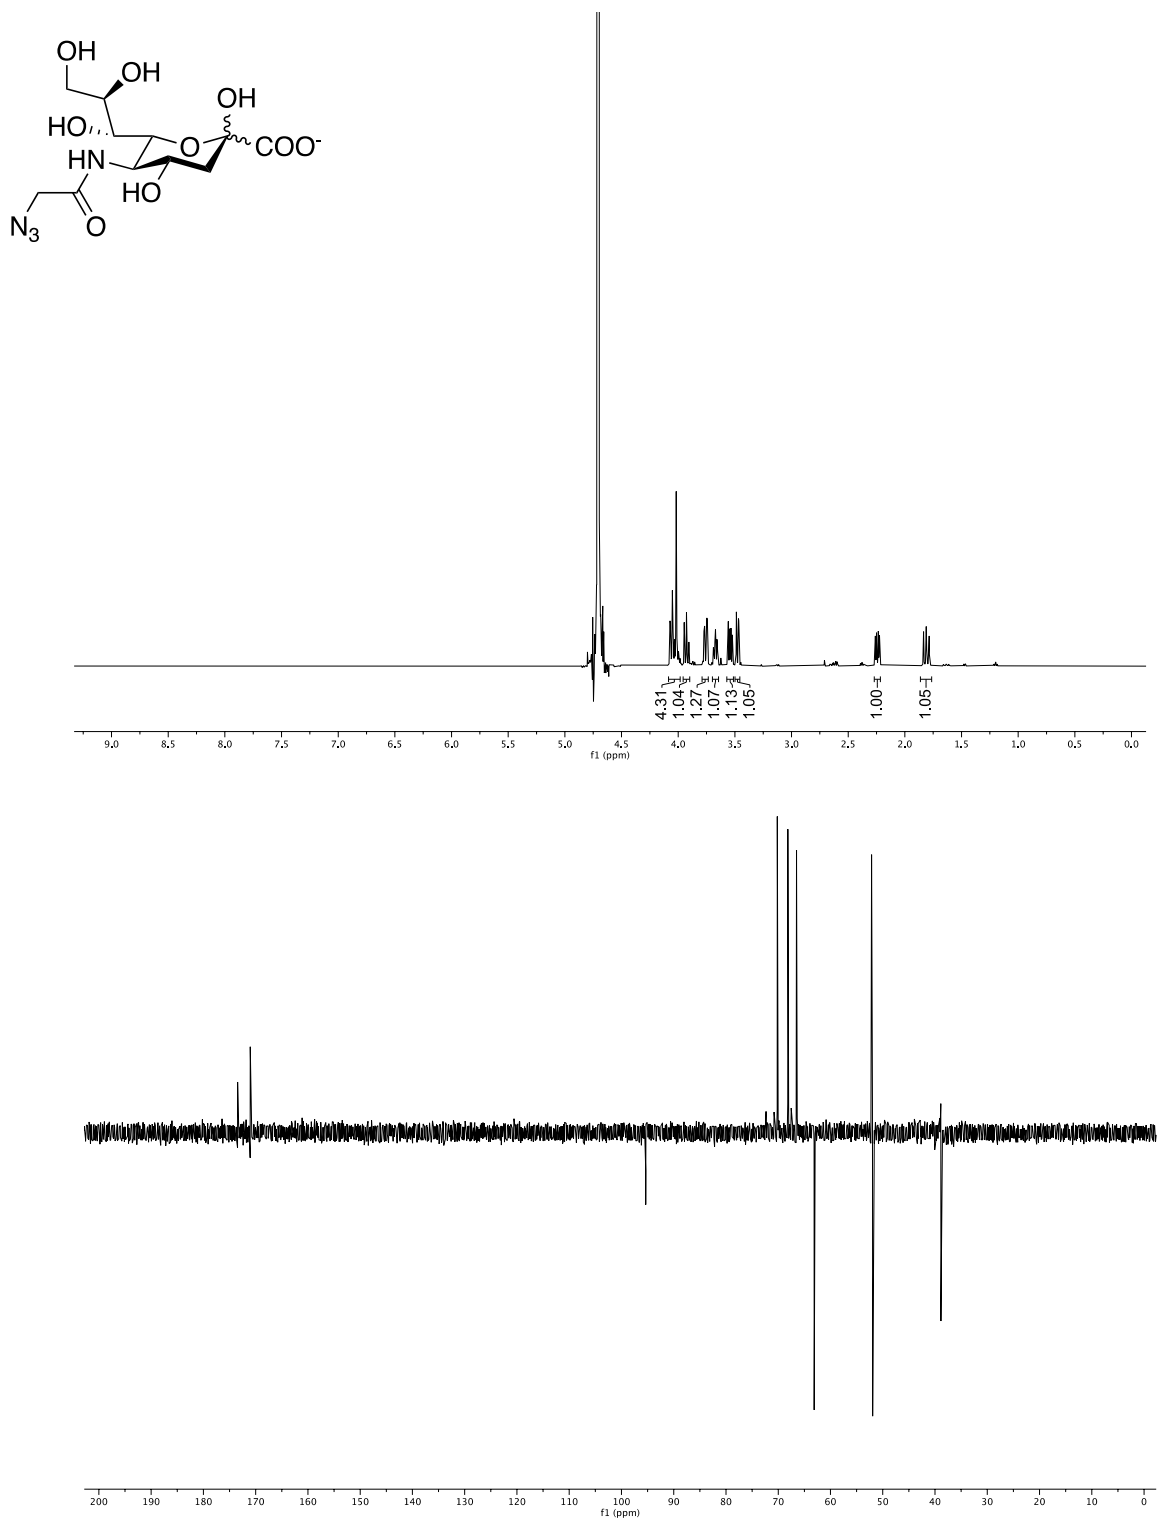

Figure S3. <sup>1</sup>H and <sup>13</sup>C NMR spectra of synthesized *N*-azidoacetylneuraminic acid (C5-azido sialic acid) in D<sub>2</sub>O (500 MHz).

**A**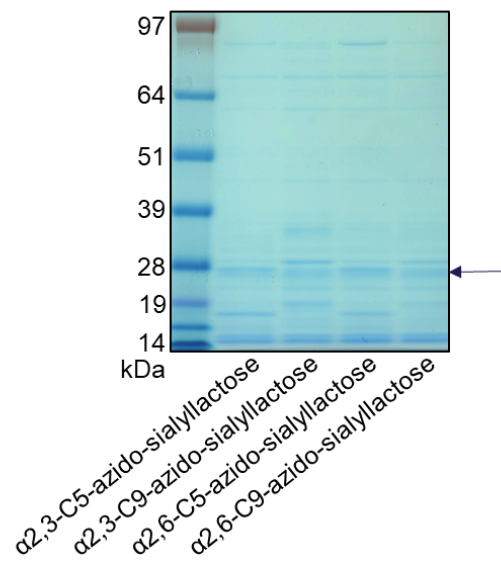**B**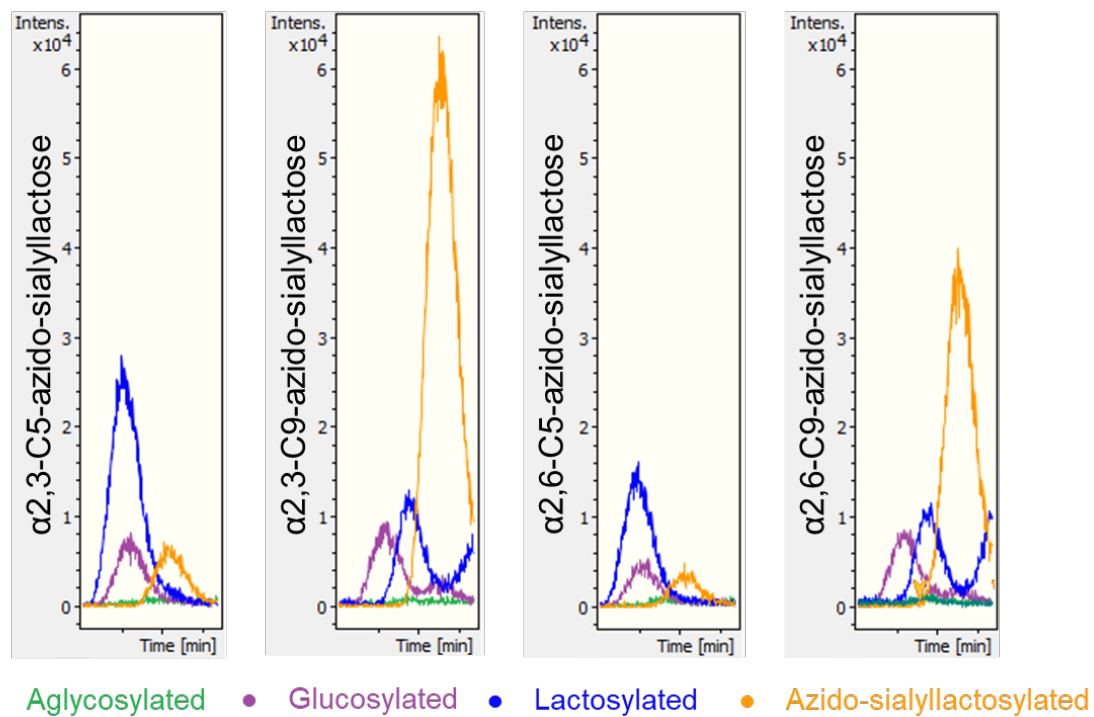

**Figure S4. Coomassie-stained protein gel and extracted ion chromatograms (EICs) of 1 mL IVG azido-sialoglycoprotein products.** Area under the curve of each EIC estimates relative abundance of each pathway intermediate and is used to calculate glycosylation efficiency.

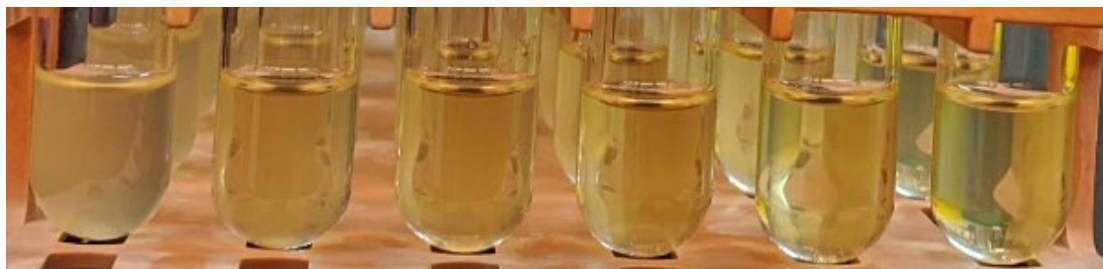

Increasing [C9-azido sialic acid] →

**Figure S5. C9-azido sialic acid demonstrates *E. coli* cell toxicity.** *E. coli* cells were supplemented with increasing [C9-azido sialic acid] from left to right (0.25, 0.5, 1, 1.5, 2, 2.5 mM) in otherwise equivalent culture conditions. Decreasing optical densities were observed for cultures incubated with increasing [C9-azido sialic acid], indicating some degree of cellular toxicity caused by the compound.

## Supplementary Tables

**Supplementary Table S1. DNA design of target glycoprotein.** The target glycoprotein, dust mite allergen (Der p 2), was designed to have a 5' CAT linker sequence (orange) to standardize the ribosome binding site for improved translation. A BamHI restriction site (gray) separated the endogenous protein sequence from its encoded Glyctag (purple) and purification affinity His tag (brown). This sequence was cloned into the pJL1 backbone at the NdeI (5') and Sall (3') restriction sites.

**DNA Sequence of target glycoprotein (in pJL1 backbone):**

**Der p 2 (His-tag)**

Cat linker Protein BamHI linker Glyctag His tag Stop codon

ATGGAGAAAAAATCGATCAGGTGGATGTAAAGATTGCGCCAACCACGAAATCAAAAAAGTTCTGG  
TTCCGGGTTGTCATGGTAGCGAACCGTGTATTATTCATCGTGGTAAACCGTTTCAGCTGGAAGCAGT  
TTTTGAAGCAAATCAGAATACCAAACCGCCAAGATTGAAATCAAAGCCAGCATTGATGGTCTGGAA  
GTTGATGTTCCGGGTATTGATCCGAATGCATGCCACTATATGAAATGTCCGCTGGTTAAAGGTCAGC  
AGTATGATATCAAATATACCTGGAACGTGCCGAAAATTGCACCGAAAAGCGAAAATGTTGTTGTGACC  
GTTAAAGTGATGGGTGATGATGGTGTCTGGCATGTGCCATTGCAACCCATGCAAAAATTCGTGATG  
GATCCGGTCGTGCAACCCACAGGTGGTAATTGGACAACCCGTCGGTGGTATCACCATCATCACC  
ATTAA

**Supplementary Table S2. NeuA DNA design with (top) and without (bottom) a CAT linker.**  
A CAT linker sequence (orange) was included at the 5' end of the NeuA sequence, which serves to standardize the ribosome binding site and can improve expression.

ATGGAGAAAAAATCGCACCAAATTATCGCAATTATTCCGGCACGTAGCGGTAGCAAAGGTCTGC  
GTAACAAAAATGCACTGATGCTGATTGATAAACCCTGCTGGCATATACCATTGAAGCAGCACTGCA  
GAGCGAAATGTTTAAAAAGTTATTGTTACCACCGACAGCGAACAGTATGGTGAATTGCCGAAAGC  
TATGGTGCAGATTTTCTGCTGCGTCCGGAAGAAGTGGCAACCATAAAGCAAGCAGCTTTGAATTTA  
TCAAACATGCCCTGAGCATCTATACCGATTATGAAAATTTTGCCTGCTGCAGCCGACCAGTCCGTTT  
CGTGATAGCACCCATATTATTGAAGCCGTGAAACTGTATCAGACCCTGGAAAAGTATCAGTGTGTTGT  
TAGCGTTACCCGTAGCAATAAACCAGCCAGATTATTCGTCCGCTGGATGATTATAGCACCCCTGAGC  
TTTTTTGATCTGGACTACAGCAAATATAACCGCAACAGCATTGTTGAATATCATCCGAATGGTGCCAT  
TTTTATCGCCAACAAACAGCATTATCTGCATACCAAACATTTTTTCGGTTCGTTATAGCCTGGCCTACAT  
CATGGATAAAGAAAGCTCACTGGATATCGATGATCGCATGGATTTTGAAGTGGCCATTACCATTGAGC  
AGAAGAAAAATCGTCAGAAGATTCTGTACCAGAACATCCATAATCGCATCAACGAAAAACGCAACGA  
ATTTGATAGCGTGAGCGATATTACCCTGATTGGTCATAGCCTGTTTGAATTATTGGGACGTGAAAAAGA  
TCAACGACATCGAAGTTAATAACCTGGGTATTGCCGGTATCAACAGCAAAGAATATTACGAGTACATC  
ATCGAGAAAGAGCGCATTGTTAATTTTGGCGAATTCGTGTTTATCTTTTTTCGGCACCAATGATATTGTT  
GTGAGCGACTGGAAAAAGAGGATACCCTTTGGTATCTGAAAAAGACCTGCCAGTACATCAAAAAA  
AGAATGCAGCCAGCAAATCTACCTGCTGAGCGTTCCGCCTGTTTTTGGTCGTATTGATCGTGATAAT  
CGTATCATCAATGACCTGAATAGCTATCTGCGTGAAAATGTGGATTTTCGCCAAATTTATCAGCCTGGA  
TCATGTTCTGAAAGATTCTATGGCAACCTGAACAAAATGTATACCTATGATGGCCTGCACCTTAACA  
GCAATGGTTATACCGTTCTGGAAAACGAAATTGCCGAGATCGTTAAATGGAGCCATCCGCAGTTCTGA  
AAAAGGTGGTGGTTCTGGTGGTGGTTCTGGTGGTGGTTCTGCGTGGAGCCATCCGCAGTTTCGAAAAATA  
A

ATGCGCACCAAATTATCGCAATTATTCCGGCACGTAGCGGTAGCAAAGGTCTGCGTAACAAAAATG  
CACTGATGCTGATTGATAAACCCTGCTGGCATATACCATTGAAGCAGCACTGCAGAGCGAAATGTT  
TGAAAAAGTTATTGTTACCACCGACAGCGAACAGTATGGTGAATTGCCGAAAGCTATGGTGCAGAT  
TTTCTGCTGCGTCCGGAAGAAGTGGCAACCATAAAGCAAGCAGCTTTGAATTTATCAAACATGCC  
TGAGCATCTATACCGATTATGAAAATTTTGCCTGCTGCAGCCGACCAGTCCGTTTCGTGATAGCAC  
CCATATTATTGAAGCCGTGAAACTGTATCAGACCCTGGAAAAGTATCAGTGTGTTGTTAGCGTTACCC  
GTAGCAATAAACCAGCCAGATTATTCGTCCGCTGGATGATTATAGCACCCCTGAGCTTTTTTATGCTG  
GACTACAGCAAATATAACCGCAACAGCATTGTTGAATATCATCCGAATGGTGCCATTTTTATCGCCAA  
CAAACAGCATTATCTGCATACCAAACATTTTTTCGGTTCGTTATAGCCTGGCCTACATCATGGATAAAG  
AAAGCTCACTGGATATCGATGATCGCATGGATTTTGAAGTGGCCATTACCATTGAGCAGAAGAAAAAT  
CGTCAGAAGATTCTGTACCAGAACATCCATAATCGCATCAACGAAAAACGCAACGAATTTGATAGCGT  
GAGCGATATTACCCTGATTGGTCATAGCCTGTTTGAATTATTGGGACGTGAAAAAGATCAACGACATC  
GAAGTTAATAACCTGGGTATTGCCGGTATCAACAGCAAAGAATATTACGAGTACATCATCGAGAAAGA  
GCGCATTGTTAATTTTGGCGAATTCGTGTTTATCTTTTTTCGGCACCAATGATATTGTTGTGAGCGACT  
GGAAAAAGAGGATACCCTTTGGTATCTGAAAAAGACCTGCCAGTACATCAAAAAAAGAATGCAGC  
CAGCAAATCTACCTGCTGAGCGTTCCGCCTGTTTTTGGTCGTATTGATCGTGATAATCGTATCATCA  
ATGACCTGAATAGCTATCTGCGTGAAAATGTGGATTTTCGCCAAATTTATCAGCCTGGATCATGTTCTG  
AAAGATTCTATGGCAACCTGAACAAAATGTATACCTATGATGGCCTGCACTTTAACAGCAATGGTTA  
TACCGTTCTGGAAAACGAAATTGCCGAGATCGTTAAATGGAGCCATCCGCAGTTTCGAAAAAGGTGGT  
GTTCTGGTGGTGGTTCTGGTGGTGGTTCTGCGTGGAGCCATCCGCAGTTTCGAAAAATAA



**Supplementary Table S3. Addgene ID's for plasmid accession.** All plasmids used in this study have been made accessible on Addgene. Addgene ID and plasmid name are listed here for easy retrieval.

| <b>Plasmid Name</b> | <b>Addgene ID</b> |
|---------------------|-------------------|
| ApNGT.pJL1          | 199111            |
| LgtB.pJL1           | 199112            |
| CSTI.pJL1           | 199113            |
| PdST6.pJL1          | 199114            |
| NeuA.pJL1           | 199115            |
| Derp2.pJL1          | 199116            |

**Supplementary Table S4. Theoretical m/z values.** Calculated m/z values were used to make extracted ion chromatograms for each species to calculate area under the curve as an estimation of glycosylation efficiency. Sugars were installed onto the asparagine within the peptide sequence ATTGGNWTTR. Glycoprotein samples were trypsinized to yield this remaining glycopeptide sequence.

| <b>Species</b>                      | <b>Theoretical m/z<br/>in +2 charge<br/>state</b> |
|-------------------------------------|---------------------------------------------------|
| Aglycosylated peptide               | 532.7596                                          |
| Glucosylated peptide                | 613.78665                                         |
| Lactosylated peptide                | 694.81165                                         |
| Sialyllactosylated peptide          | 840.35935                                         |
| C5-azido-sialyllactosylated peptide | 860.94601                                         |
| C9-azido-sialyllactosylated peptide | 852.94651                                         |

**Supplementary Table S5. Peak lists used to generate mass spectra.** Yellow highlight = species of interest. Red = contaminating species carried over from purification. Intensity of species in red was manually reduced (I% deconvolute column) to eliminate noise and emphasize peaks of interest in final spectra.

**Peak list for  $\alpha$ 2,3 C5-azido-sialyllactose species**

1

| m/z      | I % | I %<br>deconvolute | 511.2524 | 1   | 1   | 521.0177 | 1.6  | 1.6 |
|----------|-----|--------------------|----------|-----|-----|----------|------|-----|
|          |     |                    | 511.7492 | 0.3 | 0.3 | 521.2734 | 1.4  | 1.4 |
| 500.2512 | 0.3 | 0.3                | 511.8988 | 0.2 | 0.2 | 521.3372 | 0.4  | 0.4 |
| 500.286  | 0.9 | 0.9                | 512.0602 | 0.2 | 0.2 | 521.5176 | 0.3  | 0.3 |
| 500.7582 | 0.3 | 0.3                | 512.2611 | 3.2 | 1   | 521.6117 | 1.1  | 1.1 |
| 501.2483 | 0.8 | 0.8                | 512.5963 | 2.5 | 1   | 521.7625 | 0.2  | 0.2 |
| 501.3139 | 0.3 | 0.3                | 512.7519 | 0.2 | 0.2 | 521.9434 | 0.7  | 0.7 |
| 501.3414 | 0.5 | 0.5                | 512.9305 | 1.1 | 1.1 | 522.2876 | 2.1  | 1   |
| 501.5764 | 0.3 | 0.3                | 513.2326 | 2.7 | 1   | 522.3314 | 1.4  | 1.4 |
| 501.7557 | 0.2 | 0.2                | 513.2794 | 2.7 | 1   | 522.5576 | 1    | 1   |
| 501.7822 | 0.2 | 0.2                | 513.4827 | 2.7 | 1   | 522.6083 | 0.2  | 0.2 |
| 501.9105 | 0.2 | 0.2                | 513.5934 | 0.1 | 0.1 | 522.7007 | 1.8  | 1.8 |
| 502.3255 | 7.5 | 1                  | 513.7337 | 2   | 2   | 522.7867 | 0.9  | 0.9 |
| 502.4919 | 0.3 | 0.3                | 513.9233 | 0.2 | 0.2 | 522.8439 | 1.9  | 1.9 |
| 502.7709 | 0.5 | 0.5                | 513.9835 | 1   | 1   | 522.9868 | 1.5  | 1.5 |
| 502.9968 | 0.2 | 0.2                | 514.0148 | 0.2 | 0.2 | 523.1301 | 1    | 1   |
| 503.1104 | 0.2 | 0.2                | 514.2774 | 0.9 | 0.9 | 523.2843 | 1    | 1   |
| 503.2606 | 1.2 | 1.2                | 514.484  | 0.2 | 0.2 | 523.3343 | 0.6  | 0.6 |
| 503.3032 | 1.2 | 1.2                | 514.5201 | 0.2 | 0.2 | 523.4161 | 0.3  | 0.3 |
| 503.3284 | 2.1 | 1                  | 514.5625 | 4.5 | 1   | 523.5817 | 13.3 | 1   |
| 503.5052 | 0.1 | 0.1                | 514.7297 | 7.5 | 1   | 523.7852 | 0.4  | 0.4 |
| 503.6548 | 0.1 | 0.1                | 514.7926 | 1   | 1   | 523.9162 | 10.9 | 1   |
| 503.7724 | 2.3 | 1                  | 514.8966 | 7.1 | 1   | 524.2514 | 9.8  | 1   |
| 503.8553 | 0.2 | 0.2                | 514.9904 | 0.2 | 0.2 | 524.4268 | 0.4  | 0.4 |
| 504.0553 | 0.1 | 0.1                | 515.0634 | 4.7 | 1   | 524.5113 | 0.2  | 0.2 |
| 504.2716 | 1.6 | 1.6                | 515.231  | 2.6 | 1   | 524.5836 | 2.5  | 1   |
| 504.3302 | 0.4 | 0.4                | 515.2916 | 0.6 | 0.6 | 524.6236 | 0.4  | 0.4 |
| 504.4014 | 0.2 | 0.2                | 515.3297 | 0.8 | 0.8 | 524.7635 | 0.2  | 0.2 |
| 504.4991 | 0.2 | 0.2                | 515.3972 | 1.1 | 1.1 | 524.828  | 0.2  | 0.2 |
| 504.5451 | 0.2 | 0.2                | 515.5648 | 0.5 | 0.5 | 524.917  | 1    | 1   |
| 504.581  | 0.2 | 0.2                | 515.7371 | 0.2 | 0.2 | 525.019  | 0.1  | 0.1 |
| 504.6882 | 0.1 | 0.1                | 515.7907 | 0.2 | 0.2 | 525.2698 | 5    | 1   |
| 504.7734 | 0.4 | 0.4                | 515.9254 | 0.1 | 0.1 | 525.6308 | 0.2  | 0.2 |
| 504.917  | 0.2 | 0.2                | 516.2578 | 1   | 1   | 525.7727 | 2.2  | 1   |
| 505.2554 | 2.2 | 1                  | 516.3155 | 1.7 | 1.7 | 525.8287 | 0.1  | 0.1 |
| 505.5904 | 1.5 | 1.5                | 516.5904 | 0.7 | 0.7 | 525.9173 | 0.1  | 0.1 |
| 505.7435 | 0.2 | 0.2                | 516.7814 | 0.2 | 0.2 | 525.9633 | 0.2  | 0.2 |
| 505.9245 | 0.7 | 0.7                | 516.8613 | 0.2 | 0.2 | 526.202  | 0.2  | 0.2 |
| 506.2667 | 3.6 | 1                  | 516.9236 | 0.4 | 0.4 | 526.2701 | 1.6  | 1.6 |
| 506.5902 | 0.2 | 0.2                | 517.0623 | 0.3 | 0.3 | 526.3087 | 0.5  | 0.5 |
| 506.7788 | 0.4 | 0.4                | 517.2625 | 0.7 | 0.7 | 526.5207 | 0.6  | 0.6 |
| 506.8916 | 0.3 | 0.3                | 517.3068 | 1.4 | 1.4 | 526.7713 | 0.7  | 0.7 |
| 507.2698 | 1   | 1                  | 517.5239 | 0.3 | 0.3 | 526.942  | 0.3  | 0.3 |
| 507.5729 | 0.2 | 0.2                | 517.5783 | 2.3 | 1   | 527.0182 | 0.2  | 0.2 |
| 507.7865 | 0.4 | 0.4                | 517.7682 | 1.3 | 1.3 | 527.2838 | 100  | 1   |
| 508.2553 | 3.2 | 1                  | 517.9095 | 2.9 | 1   | 527.4217 | 0.1  | 0.1 |
| 508.7662 | 0.3 | 0.3                | 518.0259 | 0.2 | 0.2 | 527.459  | 0.3  | 0.3 |
| 508.936  | 0.4 | 0.4                | 518.2452 | 2.3 | 1   | 527.5117 | 0.2  | 0.2 |
| 509.2612 | 1.1 | 1.1                | 518.2987 | 0.8 | 0.8 | 527.6181 | 84.7 | 1   |
| 509.602  | 0.2 | 0.2                | 518.5763 | 1   | 1   | 527.7465 | 0.2  | 0.2 |
| 509.6501 | 0.1 | 0.1                | 518.7703 | 0.6 | 0.6 | 527.7796 | 0.3  | 0.3 |
| 509.7383 | 0.2 | 0.2                | 518.9099 | 0.4 | 0.4 | 527.952  | 42.9 | 1   |
| 509.7606 | 0.1 | 0.1                | 519.141  | 0.2 | 0.2 | 528.2338 | 1.3  | 1.3 |
| 509.9849 | 0.2 | 0.2                | 519.2728 | 0.7 | 0.7 | 528.2841 | 22.8 | 1   |
| 510.2617 | 0.7 | 0.7                | 519.4912 | 0.6 | 0.6 | 528.6197 | 4.9  | 1   |
| 510.4139 | 0.3 | 0.3                | 519.7434 | 0.7 | 0.7 | 528.7322 | 0.7  | 0.7 |
| 510.5817 | 0.3 | 0.3                | 519.9933 | 0.4 | 0.4 | 528.7875 | 0.2  | 0.2 |
| 510.7454 | 0.6 | 0.6                | 520.2691 | 1   | 1   | 528.9157 | 0.5  | 0.5 |
| 510.7913 | 0.3 | 0.3                | 520.516  | 2.3 | 1   | 528.9534 | 1.4  | 1.4 |
| 510.9103 | 0.2 | 0.2                | 520.767  | 2.7 | 1   | 529.1763 | 0.1  | 0.1 |

|          |      |     |          |     |     |          |      |     |
|----------|------|-----|----------|-----|-----|----------|------|-----|
| 529.2835 | 3    | 1   | 545.7609 | 0.1 | 0.1 | 561.3029 | 2.6  | 1   |
| 529.375  | 1.6  | 1.6 | 545.9312 | 0.1 | 0.1 | 561.5854 | 0.2  | 0.2 |
| 529.5078 | 0.1  | 0.1 | 546.0712 | 1   | 1   | 561.6266 | 0.3  | 0.3 |
| 529.5818 | 0.3  | 0.3 | 546.273  | 1.9 | 1.9 | 561.7876 | 0.5  | 0.5 |
| 529.7639 | 0.7  | 0.7 | 546.3166 | 2.7 | 1   | 561.8169 | 0.6  | 0.6 |
| 529.8104 | 0.1  | 0.1 | 546.3679 | 0.2 | 0.2 | 561.962  | 0.2  | 0.2 |
| 529.9199 | 0.1  | 0.1 | 546.472  | 1.3 | 1.3 | 562.0629 | 0.1  | 0.1 |
| 529.9509 | 0.3  | 0.3 | 546.6724 | 0.8 | 0.8 | 562.3049 | 0.8  | 0.8 |
| 530.2778 | 0.7  | 0.7 | 546.772  | 0.3 | 0.3 | 562.9891 | 0.2  | 0.2 |
| 530.3322 | 1.1  | 1.1 | 546.8725 | 0.4 | 0.4 | 563.2385 | 0.5  | 0.5 |
| 530.3779 | 0.5  | 0.5 | 547.0705 | 0.2 | 0.2 | 563.2993 | 0.4  | 0.4 |
| 530.5862 | 0.2  | 0.2 | 547.3102 | 1   | 1   | 563.5948 | 0.2  | 0.2 |
| 530.7648 | 0.3  | 0.3 | 547.6269 | 0.2 | 0.2 | 563.7431 | 0.2  | 0.2 |
| 530.9176 | 0.1  | 0.1 | 548.2905 | 0.4 | 0.4 | 563.9298 | 0.2  | 0.2 |
| 531.2815 | 1.5  | 1.5 | 549.2695 | 3   | 1   | 564.2765 | 0.4  | 0.4 |
| 531.3234 | 0.6  | 0.6 | 549.589  | 0.3 | 0.3 | 564.5217 | 0.1  | 0.1 |
| 531.6017 | 0.2  | 0.2 | 549.77   | 1.6 | 1.6 | 564.7726 | 0.1  | 0.1 |
| 531.781  | 0.7  | 0.7 | 549.924  | 0.2 | 0.2 | 564.9789 | 0.3  | 0.3 |
| 531.9368 | 0.1  | 0.1 | 550.0325 | 0.2 | 0.2 | 565.2717 | 1.7  | 1.7 |
| 532.2788 | 0.6  | 0.6 | 550.2613 | 3.8 | 1   | 565.3148 | 2    | 2   |
| 532.6152 | 0.8  | 0.8 | 550.5326 | 0.1 | 0.1 | 565.538  | 0.3  | 0.3 |
| 532.7657 | 0.3  | 0.3 | 550.61   | 0.2 | 0.2 | 565.6461 | 0.2  | 0.2 |
| 532.9495 | 0.7  | 0.7 | 550.7626 | 2.2 | 1   | 565.7762 | 1    | 1   |
| 533.2824 | 1.1  | 1.1 | 550.9411 | 0.2 | 0.2 | 565.8167 | 0.6  | 0.6 |
| 533.3277 | 0.2  | 0.2 | 551.2658 | 0.9 | 0.9 | 566.0393 | 0.3  | 0.3 |
| 533.5321 | 0.5  | 0.5 | 551.7655 | 0.3 | 0.3 | 566.2816 | 0.6  | 0.6 |
| 533.6159 | 0.2  | 0.2 | 551.8255 | 1.1 | 1.1 | 566.7803 | 0.2  | 0.2 |
| 533.7794 | 0.3  | 0.3 | 552.2754 | 0.5 | 0.5 | 567.2918 | 0.5  | 0.5 |
| 534.0336 | 0.1  | 0.1 | 552.3088 | 0.9 | 0.9 | 567.3491 | 0.1  | 0.1 |
| 534.2795 | 2.1  | 2.1 | 552.6152 | 0.3 | 0.3 | 567.7833 | 0.2  | 0.2 |
| 534.6192 | 0.1  | 0.1 | 552.7708 | 0.2 | 0.2 | 568.2454 | 0.2  | 0.2 |
| 534.759  | 0.2  | 0.2 | 552.8278 | 0.2 | 0.2 | 568.3053 | 1.6  | 1.6 |
| 535.279  | 0.7  | 0.7 | 552.9493 | 0.2 | 0.2 | 568.6422 | 1.3  | 1.3 |
| 535.775  | 0.2  | 0.2 | 553.281  | 0.4 | 0.4 | 568.8575 | 0.5  | 0.5 |
| 536.1697 | 0.2  | 0.2 | 553.303  | 0.4 | 0.4 | 568.955  | 1    | 1   |
| 536.2053 | 0.2  | 0.2 | 553.6141 | 0.2 | 0.2 | 569.0579 | 0.4  | 0.4 |
| 536.272  | 1.1  | 1.1 | 553.7628 | 0.3 | 0.3 | 569.2872 | 1    | 1   |
| 536.5654 | 0.1  | 0.1 | 553.9461 | 0.1 | 0.1 | 569.4589 | 0.2  | 0.2 |
| 537.2758 | 0.5  | 0.5 | 554.2687 | 0.4 | 0.4 | 569.62   | 0.7  | 0.7 |
| 538.2898 | 5.3  | 1   | 554.7046 | 0.1 | 0.1 | 569.7846 | 0.1  | 0.1 |
| 539.0014 | 0.2  | 0.2 | 554.7705 | 0.1 | 0.1 | 569.9514 | 0.4  | 0.4 |
| 539.2915 | 1.7  | 1.7 | 554.8481 | 0.1 | 0.1 | 570.1478 | 0.2  | 0.2 |
| 539.5043 | 0.1  | 0.1 | 555.2846 | 0.3 | 0.3 | 570.29   | 1    | 1   |
| 539.7762 | 0.2  | 0.2 | 555.3635 | 0.2 | 0.2 | 570.4343 | 0.1  | 0.1 |
| 539.9352 | 0.8  | 0.8 | 555.6187 | 0.1 | 0.1 | 570.7911 | 0.5  | 0.5 |
| 540.2715 | 0.9  | 0.9 | 555.7876 | 0.2 | 0.2 | 571.3115 | 0.5  | 0.5 |
| 540.603  | 0.3  | 0.3 | 555.9138 | 0.2 | 0.2 | 571.7996 | 0.2  | 0.2 |
| 540.7671 | 0.2  | 0.2 | 556.0379 | 0.4 | 0.4 | 572.2959 | 0.7  | 0.7 |
| 540.9376 | 0.2  | 0.2 | 556.1639 | 0.4 | 0.4 | 572.3535 | 0.3  | 0.3 |
| 541.2833 | 22.7 | 1   | 556.2889 | 0.6 | 0.6 | 572.6267 | 0.5  | 0.5 |
| 541.3489 | 0.9  | 0.9 | 556.4152 | 0.3 | 0.3 | 572.8084 | 0.2  | 0.2 |
| 541.7394 | 2.9  | 1   | 556.5385 | 0.2 | 0.2 | 572.9602 | 0.3  | 0.3 |
| 541.7847 | 12.5 | 1   | 556.7524 | 0.1 | 0.1 | 573.2902 | 0.4  | 0.4 |
| 542.2414 | 1.6  | 1.6 | 556.9212 | 0.2 | 0.2 | 573.3383 | 2.6  | 1   |
| 542.286  | 4.7  | 1   | 557.2581 | 0.3 | 0.3 | 573.6116 | 0.2  | 0.2 |
| 542.3484 | 0.3  | 0.3 | 557.3313 | 0.3 | 0.3 | 573.9485 | 0.2  | 0.2 |
| 542.7431 | 0.5  | 0.5 | 557.3794 | 0.2 | 0.2 | 574.2877 | 0.4  | 0.4 |
| 542.7867 | 1.2  | 1.2 | 557.7654 | 0.3 | 0.3 | 574.3412 | 0.9  | 0.9 |
| 543.2495 | 0.2  | 0.2 | 558.2675 | 0.4 | 0.4 | 574.6174 | 0.2  | 0.2 |
| 543.2843 | 0.5  | 0.5 | 558.3623 | 0.1 | 0.1 | 574.785  | 0.3  | 0.3 |
| 543.3622 | 0.3  | 0.3 | 558.7991 | 0.5 | 0.5 | 574.8495 | 0.1  | 0.1 |
| 543.7653 | 0.5  | 0.5 | 559.3047 | 0.4 | 0.4 | 575.2173 | 0.3  | 0.3 |
| 544.0166 | 0.2  | 0.2 | 559.3466 | 0.7 | 0.7 | 575.3108 | 0.5  | 0.5 |
| 544.2883 | 1.7  | 1.7 | 559.8033 | 0.2 | 0.2 | 575.62   | 19.5 | 1   |
| 544.5173 | 0.2  | 0.2 | 560.2616 | 0.5 | 0.5 | 575.7819 | 0.5  | 0.5 |
| 544.7648 | 0.3  | 0.3 | 560.3135 | 0.5 | 0.5 | 575.9544 | 17.3 | 1   |
| 544.9301 | 0.4  | 0.4 | 560.6246 | 0.8 | 0.8 | 576.0307 | 0.4  | 0.4 |
| 545.3136 | 8.9  | 1   | 560.7606 | 0.3 | 0.3 | 576.2903 | 11.3 | 1   |
| 545.3679 | 0.5  | 0.5 | 560.8069 | 0.4 | 0.4 | 576.5329 | 0.2  | 0.2 |
| 545.5971 | 0.3  | 0.3 | 560.9575 | 0.9 | 0.9 | 576.6225 | 3.3  | 1   |

|          |      |     |          |      |     |          |     |     |
|----------|------|-----|----------|------|-----|----------|-----|-----|
| 576.803  | 0.4  | 0.4 | 596.6953 | 0.3  | 0.3 | 612.8026 | 0.2 | 0.2 |
| 576.9567 | 1    | 1   | 596.8976 | 0.1  | 0.1 | 612.8407 | 0.3 | 0.3 |
| 577.298  | 1.6  | 1.6 | 596.9659 | 0.3  | 0.3 | 612.8954 | 0.2 | 0.2 |
| 577.6375 | 0.4  | 0.4 | 597.2941 | 0.8  | 0.8 | 613.3096 | 0.4 | 0.4 |
| 577.9717 | 0.4  | 0.4 | 597.6392 | 0.2  | 0.2 | 613.7901 | 1.1 | 1.1 |
| 578.2982 | 0.6  | 0.6 | 597.701  | 0.2  | 0.2 | 614.2924 | 0.9 | 0.9 |
| 578.8193 | 0.1  | 0.1 | 597.9017 | 0.4  | 0.4 | 614.3271 | 0.4 | 0.4 |
| 578.9413 | 0.1  | 0.1 | 597.9728 | 0.1  | 0.1 | 614.4118 | 2.3 | 2.3 |
| 579.2807 | 0.7  | 0.7 | 598.102  | 0.4  | 0.4 | 614.7943 | 0.5 | 0.5 |
| 579.3226 | 0.4  | 0.4 | 598.3018 | 0.5  | 0.5 | 614.9902 | 0.2 | 0.2 |
| 579.8057 | 0.6  | 0.6 | 598.5015 | 0.1  | 0.1 | 615.3102 | 0.3 | 0.3 |
| 580.3126 | 3.2  | 1   | 599.3368 | 9.5  | 1   | 615.4141 | 0.7 | 0.7 |
| 580.82   | 0.5  | 0.5 | 599.6767 | 0.2  | 0.2 | 615.6432 | 0.9 | 0.9 |
| 581.3045 | 1.5  | 1.5 | 599.8381 | 5.6  | 1   | 615.8029 | 0.2 | 0.2 |
| 581.8049 | 0.5  | 0.5 | 600.3399 | 2.3  | 1   | 615.9767 | 0.8 | 0.8 |
| 582.3037 | 0.6  | 0.6 | 600.4107 | 1    | 1   | 616.2778 | 0.3 | 0.3 |
| 582.5478 | 0.3  | 0.3 | 600.8405 | 0.6  | 0.6 | 616.3114 | 0.7 | 0.7 |
| 582.801  | 0.5  | 0.5 | 601.3022 | 0.3  | 0.3 | 616.3434 | 1.2 | 1.2 |
| 582.9479 | 0.1  | 0.1 | 601.369  | 0.9  | 0.9 | 616.3789 | 0.8 | 0.8 |
| 583.0168 | 0.1  | 0.1 | 601.4133 | 0.3  | 0.3 | 616.6447 | 0.3 | 0.3 |
| 583.0491 | 0.3  | 0.3 | 601.7967 | 0.2  | 0.2 | 616.7883 | 0.1 | 0.1 |
| 583.3104 | 0.4  | 0.4 | 601.9713 | 0.9  | 0.9 | 617.0463 | 0.4 | 0.4 |
| 583.5191 | 0.1  | 0.1 | 602.3049 | 1.2  | 1.2 | 617.2737 | 5.4 | 1   |
| 583.7701 | 0.1  | 0.1 | 602.3643 | 0.5  | 0.5 | 617.3444 | 0.8 | 0.8 |
| 584.3214 | 0.7  | 0.7 | 602.6397 | 0.5  | 0.5 | 617.4736 | 8.4 | 1   |
| 584.3784 | 0.1  | 0.1 | 602.816  | 1.4  | 1.4 | 617.547  | 0.3 | 0.3 |
| 584.6155 | 1.5  | 1.5 | 602.993  | 41.2 | 1   | 617.674  | 8   | 1   |
| 584.7636 | 0.2  | 0.2 | 603.3272 | 40.5 | 1   | 617.7949 | 0.2 | 0.2 |
| 584.9509 | 1.9  | 1.9 | 603.6613 | 22.5 | 1   | 617.8744 | 5.2 | 1   |
| 585.3033 | 2.4  | 1   | 603.8201 | 0.4  | 0.4 | 618.0745 | 2.8 | 1   |
| 585.3749 | 3.6  | 1   | 603.9951 | 9.4  | 1   | 618.276  | 1.4 | 1.4 |
| 585.6208 | 0.5  | 0.5 | 604.2748 | 0.2  | 0.2 | 618.3386 | 1.5 | 1.5 |
| 585.8078 | 1.4  | 1.4 | 604.3289 | 3.5  | 1   | 618.475  | 0.6 | 0.6 |
| 585.9554 | 0.2  | 0.2 | 604.6665 | 0.9  | 0.9 | 618.6736 | 0.2 | 0.2 |
| 586.3063 | 1    | 1   | 604.7839 | 0.3  | 0.3 | 618.8099 | 0.3 | 0.3 |
| 586.3761 | 1.4  | 1.4 | 605.0088 | 0.4  | 0.4 | 618.877  | 0.1 | 0.1 |
| 586.8059 | 0.5  | 0.5 | 605.2771 | 0.3  | 0.3 | 619.3265 | 3.1 | 1   |
| 586.8948 | 0.2  | 0.2 | 605.3429 | 0.4  | 0.4 | 619.8001 | 0.2 | 0.2 |
| 587.2302 | 0.2  | 0.2 | 605.7833 | 0.1  | 0.1 | 619.9749 | 0.1 | 0.1 |
| 587.3084 | 0.3  | 0.3 | 606.3048 | 0.3  | 0.3 | 620.227  | 0.1 | 0.1 |
| 587.3547 | 1.6  | 1.6 | 606.813  | 1.4  | 1.4 | 620.2885 | 1   | 1   |
| 588.1327 | 0.3  | 0.3 | 607.0654 | 1.5  | 1.5 | 620.3286 | 1.4 | 1.4 |
| 588.3383 | 13.2 | 1   | 607.3192 | 1.4  | 1.4 | 620.476  | 0.1 | 0.1 |
| 588.4667 | 0.7  | 0.7 | 607.5659 | 0.6  | 0.6 | 620.6319 | 0.2 | 0.2 |
| 588.6049 | 0.3  | 0.3 | 607.8305 | 0.6  | 0.6 | 620.7887 | 0.6 | 0.6 |
| 588.6334 | 0.5  | 0.5 | 608.3264 | 0.7  | 0.7 | 620.9667 | 0.3 | 0.3 |
| 588.8016 | 0.5  | 0.5 | 608.659  | 0.4  | 0.4 | 621.3296 | 0.7 | 0.7 |
| 588.9658 | 0.2  | 0.2 | 608.7938 | 0.1  | 0.1 | 621.6343 | 0.2 | 0.2 |
| 589.0116 | 0.3  | 0.3 | 608.9927 | 0.2  | 0.2 | 621.9805 | 0.1 | 0.1 |
| 589.2702 | 0.3  | 0.3 | 609.3029 | 1.2  | 1.2 | 622.0331 | 0.2 | 0.2 |
| 589.3347 | 16.2 | 1   | 609.4818 | 2.8  | 1   | 622.3241 | 0.3 | 0.3 |
| 589.5112 | 0.2  | 0.2 | 609.6489 | 5.6  | 1   | 622.6501 | 0.2 | 0.2 |
| 589.7632 | 0.2  | 0.2 | 609.8159 | 6    | 1   | 622.8258 | 0.8 | 0.8 |
| 590.3369 | 4.6  | 1   | 609.9829 | 4.5  | 1   | 622.9795 | 0.1 | 0.1 |
| 590.7937 | 0.3  | 0.3 | 610.15   | 3    | 1   | 623.3043 | 4   | 1   |
| 591.2956 | 0.5  | 0.5 | 610.3176 | 2.3  | 1   | 623.349  | 0.8 | 0.8 |
| 591.3368 | 1    | 1   | 610.4839 | 0.7  | 0.7 | 623.8213 | 0.5 | 0.5 |
| 592.2468 | 0.1  | 0.1 | 610.6531 | 0.8  | 0.8 | 624.3102 | 1.3 | 1.3 |
| 592.3117 | 0.3  | 0.3 | 610.7905 | 0.4  | 0.4 | 624.8247 | 0.3 | 0.3 |
| 593.2987 | 0.2  | 0.2 | 610.8204 | 0.2  | 0.2 | 625.0617 | 0.2 | 0.2 |
| 593.8049 | 0.2  | 0.2 | 610.9869 | 0.4  | 0.4 | 625.303  | 0.6 | 0.6 |
| 594.2801 | 0.3  | 0.3 | 611.0386 | 0.4  | 0.4 | 625.8002 | 0.2 | 0.2 |
| 594.3348 | 0.2  | 0.2 | 611.2909 | 0.4  | 0.4 | 626.301  | 0.4 | 0.4 |
| 595.0548 | 0.1  | 0.1 | 611.5406 | 0.2  | 0.2 | 626.3496 | 0.1 | 0.1 |
| 595.2865 | 7.6  | 1   | 611.793  | 0.2  | 0.2 | 627.2997 | 0.2 | 0.2 |
| 595.6909 | 0.7  | 0.7 | 612.0942 | 0.3  | 0.3 | 627.3849 | 0.5 | 0.5 |
| 595.8912 | 1.1  | 1.1 | 612.2959 | 0.6  | 0.6 | 628.3097 | 0.2 | 0.2 |
| 596.0919 | 1    | 1   | 612.4929 | 0.5  | 0.5 | 628.3854 | 0.3 | 0.3 |
| 596.2902 | 3    | 1   | 612.6469 | 0.1  | 0.1 | 628.8519 | 0.2 | 0.2 |
| 596.4941 | 0.4  | 0.4 | 612.6958 | 0.3  | 0.3 | 629.3476 | 0.3 | 0.3 |

|          |     |     |          |     |     |          |     |     |
|----------|-----|-----|----------|-----|-----|----------|-----|-----|
| 629.78   | 0.1 | 0.1 | 653.6999 | 0.2 | 0.2 | 682.3347 | 0.5 | 0.5 |
| 629.839  | 0.4 | 0.4 | 653.8367 | 0.2 | 0.2 | 682.4126 | 0.2 | 0.2 |
| 629.9345 | 0.1 | 0.1 | 653.9    | 0.2 | 0.2 | 682.5869 | 0.4 | 0.4 |
| 630.062  | 0.1 | 0.1 | 654.1014 | 0.1 | 0.1 | 682.8364 | 0.5 | 0.5 |
| 630.3493 | 0.3 | 0.3 | 654.3305 | 0.3 | 0.3 | 683.0879 | 0.3 | 0.3 |
| 630.3855 | 0.2 | 0.2 | 655.0303 | 0.2 | 0.2 | 683.3405 | 0.2 | 0.2 |
| 631.3426 | 0.4 | 0.4 | 655.2817 | 0.3 | 0.3 | 683.9725 | 0.8 | 0.8 |
| 632.2504 | 0.2 | 0.2 | 655.5307 | 0.2 | 0.2 | 684.3074 | 1   | 1   |
| 632.3454 | 0.9 | 0.9 | 655.8272 | 0.1 | 0.1 | 684.3511 | 0.1 | 0.1 |
| 632.4488 | 0.1 | 0.1 | 656.3253 | 0.2 | 0.2 | 684.6407 | 0.6 | 0.6 |
| 632.6451 | 0.1 | 0.1 | 656.3993 | 0.2 | 0.2 | 684.9745 | 0.3 | 0.3 |
| 632.8341 | 0.2 | 0.2 | 656.84   | 0.2 | 0.2 | 685.3088 | 0.2 | 0.2 |
| 633.3354 | 0.6 | 0.6 | 657.322  | 0.3 | 0.3 | 685.3615 | 0.2 | 0.2 |
| 633.8319 | 0.3 | 0.3 | 657.4039 | 0.2 | 0.2 | 685.4036 | 0.5 | 0.5 |
| 634.2902 | 0.1 | 0.1 | 657.8256 | 0.2 | 0.2 | 685.4375 | 1   | 1   |
| 634.3457 | 1   | 1   | 658.3448 | 0.2 | 0.2 | 686.2709 | 0.4 | 0.4 |
| 634.7963 | 0.2 | 0.2 | 658.3915 | 1.2 | 1.2 | 686.3688 | 0.8 | 0.8 |
| 634.8398 | 0.1 | 0.1 | 659.3408 | 0.8 | 0.8 | 686.4248 | 0.6 | 0.6 |
| 635.1851 | 0.2 | 0.2 | 659.3943 | 0.5 | 0.5 | 686.6049 | 0.4 | 0.4 |
| 635.3314 | 0.6 | 0.6 | 659.7005 | 0.3 | 0.3 | 686.8699 | 0.6 | 0.6 |
| 635.4713 | 0.6 | 0.6 | 659.8408 | 0.5 | 0.5 | 686.9405 | 0.2 | 0.2 |
| 635.6153 | 0.5 | 0.5 | 659.9011 | 0.5 | 0.5 | 687.2735 | 0.1 | 0.1 |
| 635.7579 | 0.3 | 0.3 | 660.1007 | 0.4 | 0.4 | 687.3814 | 2.8 | 1   |
| 635.9008 | 0.2 | 0.2 | 660.3022 | 0.5 | 0.5 | 688.3874 | 1.1 | 1.1 |
| 636.0439 | 0.1 | 0.1 | 660.3702 | 4.6 | 1   | 688.8242 | 1.2 | 1.2 |
| 636.302  | 0.2 | 0.2 | 660.5017 | 0.2 | 0.2 | 689.3264 | 0.9 | 0.9 |
| 636.3489 | 0.4 | 0.4 | 660.8552 | 0.2 | 0.2 | 689.3774 | 0.4 | 0.4 |
| 636.5617 | 0.1 | 0.1 | 661.3725 | 1.7 | 1.7 | 689.6952 | 0.1 | 0.1 |
| 636.81   | 0.2 | 0.2 | 662.2927 | 0.5 | 0.5 | 689.8267 | 0.3 | 0.3 |
| 637.3377 | 0.4 | 0.4 | 662.3529 | 0.8 | 0.8 | 690.0305 | 0.1 | 0.1 |
| 637.8189 | 5   | 1   | 663.3315 | 0.4 | 0.4 | 690.3265 | 0.4 | 0.4 |
| 638.32   | 3.4 | 1   | 663.845  | 0.1 | 0.1 | 690.3663 | 0.3 | 0.3 |
| 638.8209 | 1.3 | 1.3 | 664.3084 | 3   | 1   | 690.8256 | 0.3 | 0.3 |
| 639.3466 | 0.7 | 0.7 | 664.6597 | 0.2 | 0.2 | 691.3289 | 0.3 | 0.3 |
| 639.8236 | 0.1 | 0.1 | 664.8423 | 0.1 | 0.1 | 692.3602 | 2.4 | 1   |
| 640.3451 | 0.3 | 0.3 | 665.0005 | 0.3 | 0.3 | 692.6535 | 0.4 | 0.4 |
| 640.8329 | 0.1 | 0.1 | 665.1711 | 0.2 | 0.2 | 692.861  | 1.6 | 1.6 |
| 641.3238 | 0.2 | 0.2 | 665.3121 | 1.1 | 1.1 | 692.9873 | 0.2 | 0.2 |
| 641.36   | 0.2 | 0.2 | 666.3477 | 1.1 | 1.1 | 693.3632 | 0.8 | 0.8 |
| 642.3595 | 0.6 | 0.6 | 667.3496 | 0.4 | 0.4 | 693.685  | 0.7 | 0.7 |
| 642.834  | 0.3 | 0.3 | 668.3134 | 0.4 | 0.4 | 693.8616 | 0.3 | 0.3 |
| 643.3474 | 1.2 | 1.2 | 668.3468 | 0.2 | 0.2 | 694.0196 | 0.7 | 0.7 |
| 643.4133 | 0.2 | 0.2 | 668.5054 | 0.1 | 0.1 | 694.3549 | 3.6 | 3.6 |
| 644.3566 | 0.5 | 0.5 | 668.8144 | 0.2 | 0.2 | 694.6872 | 0.2 | 0.2 |
| 644.4317 | 0.2 | 0.2 | 669.3177 | 0.2 | 0.2 | 694.8161 | 3.2 | 3.2 |
| 644.8392 | 0.4 | 0.4 | 669.3534 | 0.3 | 0.3 | 695.3175 | 2.5 | 2.5 |
| 645.3513 | 0.3 | 0.3 | 669.8108 | 0.1 | 0.1 | 695.3565 | 1.2 | 1.2 |
| 645.8175 | 0.7 | 0.7 | 670.3138 | 3.7 | 1   | 695.8189 | 0.9 | 0.9 |
| 646.3549 | 2.2 | 1   | 670.3916 | 2.5 | 1   | 696.3701 | 2.7 | 2.7 |
| 646.8199 | 0.3 | 0.3 | 670.8149 | 2.4 | 1   | 697.3733 | 1   | 1   |
| 646.9881 | 0.1 | 0.1 | 671.3184 | 1.1 | 1.1 | 698.3756 | 0.3 | 0.3 |
| 647.1569 | 0.1 | 0.1 | 671.395  | 0.9 | 0.9 | 698.9185 | 0.1 | 0.1 |
| 647.3125 | 0.9 | 0.9 | 671.8217 | 0.3 | 0.3 | 699.2538 | 0.1 | 0.1 |
| 647.3566 | 0.8 | 0.8 | 672.3258 | 0.2 | 0.2 | 699.3534 | 0.1 | 0.1 |
| 647.7125 | 0.2 | 0.2 | 672.3965 | 0.2 | 0.2 | 699.4053 | 0.2 | 0.2 |
| 647.8126 | 0.5 | 0.5 | 672.8232 | 0.1 | 0.1 | 700.3502 | 0.2 | 0.2 |
| 648.3164 | 0.4 | 0.4 | 673.3657 | 1   | 1   | 701.3634 | 0.4 | 0.4 |
| 648.8523 | 1.5 | 1.5 | 674.297  | 0.1 | 0.1 | 701.4216 | 0.4 | 0.4 |
| 649.3494 | 1.3 | 1.3 | 674.3674 | 0.4 | 0.4 | 701.6856 | 0.1 | 0.1 |
| 649.5572 | 0.1 | 0.1 | 675.283  | 0.2 | 0.2 | 701.8754 | 0.2 | 0.2 |
| 649.8484 | 0.5 | 0.5 | 675.3634 | 1.2 | 1.2 | 702.3269 | 0.2 | 0.2 |
| 650.3582 | 0.7 | 0.7 | 675.8391 | 0.2 | 0.2 | 702.3759 | 0.5 | 0.5 |
| 650.8517 | 0.5 | 0.5 | 676.366  | 0.5 | 0.5 | 702.4226 | 0.2 | 0.2 |
| 651.3056 | 0.2 | 0.2 | 677.3642 | 0.7 | 0.7 | 703.3658 | 0.5 | 0.5 |
| 651.3541 | 0.4 | 0.4 | 678.3639 | 0.4 | 0.4 | 703.4312 | 0.1 | 0.1 |
| 651.7854 | 0.1 | 0.1 | 679.3793 | 0.9 | 0.9 | 704.3942 | 0.4 | 0.4 |
| 652.0342 | 0.2 | 0.2 | 680.3795 | 0.4 | 0.4 | 705.34   | 1.1 | 1.1 |
| 652.3269 | 1   | 1   | 680.4477 | 0.2 | 0.2 | 705.3914 | 0.2 | 0.2 |
| 652.8354 | 0.2 | 0.2 | 681.3507 | 0.2 | 0.2 | 705.5569 | 0.2 | 0.2 |
| 653.3291 | 0.4 | 0.4 | 681.826  | 0.3 | 0.3 | 705.7578 | 0.4 | 0.4 |

|          |     |     |          |     |     |          |     |     |
|----------|-----|-----|----------|-----|-----|----------|-----|-----|
| 705.8418 | 0.7 | 0.7 | 732.3792 | 0.6 | 0.6 | 771.8397 | 2   | 2   |
| 705.9587 | 0.4 | 0.4 | 732.5768 | 0.1 | 0.1 | 772.0901 | 1.5 | 1.5 |
| 706.1586 | 0.3 | 0.3 | 733.3806 | 0.2 | 0.2 | 772.3021 | 0.3 | 0.3 |
| 706.3487 | 0.4 | 0.4 | 734.3772 | 0.2 | 0.2 | 772.3408 | 0.8 | 0.8 |
| 706.8231 | 0.4 | 0.4 | 735.3733 | 0.4 | 0.4 | 772.459  | 3.8 | 1   |
| 707.356  | 4.4 | 1   | 736.3294 | 0.5 | 0.5 | 772.5908 | 0.4 | 0.4 |
| 707.824  | 0.1 | 0.1 | 736.3711 | 0.2 | 0.2 | 772.6333 | 0.4 | 0.4 |
| 708.3584 | 1.8 | 1.8 | 737.335  | 0.3 | 0.3 | 772.8417 | 0.2 | 0.2 |
| 709.36   | 0.5 | 0.5 | 737.3937 | 0.3 | 0.3 | 772.9664 | 0.3 | 0.3 |
| 710.3851 | 0.8 | 0.8 | 738.342  | 1.2 | 1.2 | 773.4556 | 8.6 | 1   |
| 710.7064 | 0.1 | 0.1 | 738.415  | 0.4 | 0.4 | 773.8764 | 0.2 | 0.2 |
| 710.8215 | 0.1 | 0.1 | 739.3508 | 0.5 | 0.5 | 774.4581 | 3.2 | 1   |
| 710.8878 | 0.5 | 0.5 | 739.4108 | 0.2 | 0.2 | 775.4375 | 1.3 | 1.3 |
| 711.0431 | 0.1 | 0.1 | 740.355  | 0.2 | 0.2 | 776.4144 | 0.8 | 0.8 |
| 711.3262 | 0.2 | 0.2 | 740.8797 | 0.2 | 0.2 | 777.4113 | 0.3 | 0.3 |
| 711.3845 | 0.3 | 0.3 | 741.0482 | 0.5 | 0.5 | 777.4604 | 0.3 | 0.3 |
| 712.3367 | 1.1 | 1.1 | 741.2147 | 0.6 | 0.6 | 778.4071 | 0.1 | 0.1 |
| 712.3884 | 0.2 | 0.2 | 741.3839 | 0.7 | 0.7 | 779.408  | 0.2 | 0.2 |
| 712.8352 | 0.2 | 0.2 | 741.549  | 0.4 | 0.4 | 781.3272 | 0.1 | 0.1 |
| 712.9594 | 0.1 | 0.1 | 741.7164 | 0.2 | 0.2 | 781.3976 | 0.2 | 0.2 |
| 713.0403 | 0.2 | 0.2 | 741.8925 | 0.8 | 0.8 | 784.8664 | 1.8 | 1.8 |
| 713.087  | 0.2 | 0.2 | 742.2693 | 0.2 | 0.2 | 785.3671 | 1.6 | 1.6 |
| 713.2117 | 0.1 | 0.1 | 742.3348 | 3.4 | 1   | 785.8679 | 0.9 | 0.9 |
| 713.3396 | 0.5 | 0.5 | 742.3936 | 0.5 | 0.5 | 786.3676 | 0.4 | 0.4 |
| 713.3763 | 0.2 | 0.2 | 742.6018 | 0.1 | 0.1 | 786.4579 | 0.9 | 0.9 |
| 713.8425 | 0.4 | 0.4 | 742.8364 | 2.3 | 1   | 786.8681 | 0.1 | 0.1 |
| 714.342  | 0.5 | 0.5 | 742.8958 | 0.2 | 0.2 | 787.4563 | 0.7 | 0.7 |
| 714.8467 | 0.2 | 0.2 | 743.3377 | 1.1 | 1.1 | 788.4367 | 0.3 | 0.3 |
| 715.3457 | 0.2 | 0.2 | 743.3995 | 0.3 | 0.3 | 789.4227 | 0.1 | 0.1 |
| 715.416  | 0.1 | 0.1 | 743.8394 | 0.4 | 0.4 | 790.4202 | 3.4 | 1   |
| 716.3375 | 0.2 | 0.2 | 744.3599 | 0.3 | 0.3 | 790.9217 | 2.8 | 1   |
| 718.3418 | 0.1 | 0.1 | 744.4028 | 0.2 | 0.2 | 791.4225 | 1.5 | 1.5 |
| 718.6658 | 0.1 | 0.1 | 744.6112 | 0.4 | 0.4 | 791.9235 | 0.6 | 0.6 |
| 719.3479 | 0.3 | 0.3 | 744.8621 | 0.3 | 0.3 | 792.4237 | 0.2 | 0.2 |
| 719.4945 | 0.3 | 0.3 | 745.1134 | 0.2 | 0.2 | 793.3513 | 0.4 | 0.4 |
| 719.6388 | 0.3 | 0.3 | 745.3661 | 0.2 | 0.2 | 793.4119 | 0.8 | 0.8 |
| 719.7816 | 0.4 | 0.4 | 746.4071 | 0.3 | 0.3 | 794.3565 | 0.2 | 0.2 |
| 719.9245 | 0.3 | 0.3 | 747.332  | 0.5 | 0.5 | 794.4162 | 0.5 | 0.5 |
| 720.0686 | 0.2 | 0.2 | 747.3761 | 0.2 | 0.2 | 795.3915 | 1.5 | 1.5 |
| 720.2853 | 0.2 | 0.2 | 748.3419 | 0.3 | 0.3 | 795.4344 | 0.5 | 0.5 |
| 720.3134 | 0.1 | 0.1 | 749.3826 | 0.2 | 0.2 | 796.3941 | 0.6 | 0.6 |
| 720.3568 | 0.2 | 0.2 | 749.4399 | 0.2 | 0.2 | 796.4386 | 0.2 | 0.2 |
| 720.4207 | 0.1 | 0.1 | 750.3169 | 0.2 | 0.2 | 797.3999 | 0.2 | 0.2 |
| 721.3683 | 0.1 | 0.1 | 750.6485 | 0.2 | 0.2 | 798.0022 | 0.1 | 0.1 |
| 722.859  | 0.1 | 0.1 | 751.3998 | 0.2 | 0.2 | 798.4097 | 0.2 | 0.2 |
| 723.36   | 0.1 | 0.1 | 751.4851 | 0.2 | 0.2 | 799.3759 | 0.4 | 0.4 |
| 725.3496 | 2.2 | 1   | 757.3806 | 0.4 | 0.4 | 800.3848 | 0.2 | 0.2 |
| 725.8479 | 0.1 | 0.1 | 757.8803 | 0.3 | 0.3 | 800.8464 | 0.3 | 0.3 |
| 726.3529 | 0.9 | 0.9 | 758.3824 | 0.2 | 0.2 | 801.3479 | 0.2 | 0.2 |
| 726.8664 | 0.1 | 0.1 | 758.4799 | 0.6 | 0.6 | 801.4849 | 0.8 | 0.8 |
| 727.3571 | 0.3 | 0.3 | 759.4373 | 0.4 | 0.4 | 802.4853 | 0.5 | 0.5 |
| 727.448  | 0.1 | 0.1 | 759.4817 | 0.2 | 0.2 | 803.487  | 0.1 | 0.1 |
| 727.8306 | 0.1 | 0.1 | 760.4163 | 1.5 | 1.5 | 804.3915 | 0.2 | 0.2 |
| 728.3692 | 0.3 | 0.3 | 761.3175 | 0.2 | 0.2 | 804.4461 | 0.2 | 0.2 |
| 728.8714 | 0.2 | 0.2 | 761.4174 | 0.6 | 0.6 | 807.4391 | 0.8 | 0.8 |
| 729.2851 | 0.9 | 0.9 | 762.4162 | 0.2 | 0.2 | 808.4419 | 0.4 | 0.4 |
| 729.3591 | 0.2 | 0.2 | 762.8982 | 0.2 | 0.2 | 808.7487 | 0.2 | 0.2 |
| 729.427  | 0.2 | 0.2 | 763.3956 | 0.2 | 0.2 | 809.0834 | 0.2 | 0.2 |
| 729.6191 | 0.9 | 0.9 | 764.3809 | 0.2 | 0.2 | 809.4224 | 0.2 | 0.2 |
| 729.9535 | 0.5 | 0.5 | 765.1191 | 0.1 | 0.1 | 810.4127 | 0.2 | 0.2 |
| 730.2881 | 0.3 | 0.3 | 765.384  | 0.2 | 0.2 | 814.3821 | 0.2 | 0.2 |
| 730.3396 | 0.2 | 0.2 | 766.3995 | 0.1 | 0.1 | 814.4807 | 0.2 | 0.2 |
| 730.415  | 0.2 | 0.2 | 767.3761 | 0.1 | 0.1 | 814.5232 | 0.2 | 0.2 |
| 730.8421 | 0.1 | 0.1 | 767.888  | 0.4 | 0.4 | 814.6686 | 0.2 | 0.2 |
| 731.1762 | 1.5 | 1.5 | 768.3883 | 0.4 | 0.4 | 814.8109 | 0.2 | 0.2 |
| 731.377  | 2.7 | 1   | 768.8896 | 0.1 | 0.1 | 815.4628 | 0.2 | 0.2 |
| 731.577  | 3   | 1   | 769.3874 | 0.1 | 0.1 | 816.449  | 0.5 | 0.5 |
| 731.7775 | 2.4 | 1   | 771.3391 | 1.4 | 1.4 | 817.4454 | 0.7 | 0.7 |
| 731.9778 | 1.4 | 1.4 | 771.4747 | 0.5 | 0.5 | 818.4471 | 0.3 | 0.3 |
| 732.1782 | 0.7 | 0.7 | 771.5892 | 2.3 | 2.3 | 819.4393 | 0.4 | 0.4 |

|          |     |     |          |     |     |          |     |     |
|----------|-----|-----|----------|-----|-----|----------|-----|-----|
| 820.4005 | 0.1 | 0.1 | 844.4871 | 0.1 | 0.1 | 876.4691 | 0.5 | 0.5 |
| 820.4463 | 0.3 | 0.3 | 846.4699 | 0.3 | 0.3 | 876.9192 | 0.4 | 0.4 |
| 820.5966 | 0.2 | 0.2 | 847.4526 | 0.2 | 0.2 | 877.4227 | 0.3 | 0.3 |
| 820.7387 | 0.2 | 0.2 | 851.4283 | 0.9 | 0.9 | 877.4717 | 0.2 | 0.2 |
| 820.8826 | 0.2 | 0.2 | 852.4303 | 0.4 | 0.4 | 878.4757 | 0.5 | 0.5 |
| 822.3636 | 0.3 | 0.3 | 852.9226 | 0.1 | 0.1 | 879.4235 | 0.7 | 0.7 |
| 822.4452 | 0.2 | 0.2 | 853.4285 | 0.2 | 0.2 | 879.4774 | 0.2 | 0.2 |
| 822.9703 | 0.1 | 0.1 | 855.4962 | 0.4 | 0.4 | 879.8388 | 0.2 | 0.2 |
| 823.1128 | 0.1 | 0.1 | 856.4991 | 0.2 | 0.2 | 880.3408 | 0.2 | 0.2 |
| 823.3966 | 2.1 | 2.1 | 857.4375 | 0.2 | 0.2 | 880.4259 | 0.3 | 0.3 |
| 823.8793 | 0.1 | 0.1 | 857.5205 | 0.2 | 0.2 | 881.8971 | 0.2 | 0.2 |
| 824.3986 | 0.9 | 0.9 | 858.4408 | 0.1 | 0.1 | 882.4055 | 0.2 | 0.2 |
| 824.6237 | 0.2 | 0.2 | 860.4304 | 0.2 | 0.2 | 883.4109 | 0.2 | 0.2 |
| 824.8745 | 0.2 | 0.2 | 860.5382 | 0.2 | 0.2 | 885.4312 | 0.2 | 0.2 |
| 825.1237 | 0.1 | 0.1 | 860.8645 | 4.9 | 4.9 | 887.497  | 3   | 3   |
| 825.3997 | 0.3 | 0.3 | 861.3658 | 3.9 | 3.9 | 888.5043 | 1.4 | 1.4 |
| 832.4322 | 0.2 | 0.2 | 861.8674 | 1.9 | 1.9 | 889.0557 | 0.2 | 0.2 |
| 835.3948 | 0.1 | 0.1 | 862.3681 | 0.7 | 0.7 | 889.256  | 0.2 | 0.2 |
| 835.5174 | 0.2 | 0.2 | 862.4785 | 0.1 | 0.1 | 889.4603 | 0.2 | 0.2 |
| 839.0766 | 0.2 | 0.2 | 862.9242 | 3.2 | 3.2 | 889.5089 | 0.4 | 0.4 |
| 839.2431 | 0.4 | 0.4 | 863.4261 | 3   | 3   | 889.6557 | 0.2 | 0.2 |
| 839.4096 | 0.6 | 0.6 | 863.9273 | 1.5 | 1.5 | 891.4612 | 0.2 | 0.2 |
| 839.5763 | 0.5 | 0.5 | 864.4289 | 0.6 | 0.6 | 892.431  | 0.1 | 0.1 |
| 839.7442 | 0.4 | 0.4 | 864.9288 | 0.2 | 0.2 | 895.413  | 0.1 | 0.1 |
| 839.9107 | 0.3 | 0.3 | 871.855  | 0.1 | 0.1 | 897.3962 | 0.1 | 0.1 |
| 840.0793 | 0.1 | 0.1 | 873.9161 | 0.2 | 0.2 | 898.4441 | 0.2 | 0.2 |
| 840.4279 | 0.1 | 0.1 | 874.4176 | 0.2 | 0.2 | 900.4488 | 0.2 | 0.2 |
| 843.4952 | 0.1 | 0.1 | 876.4184 | 0.5 | 0.5 |          |     |     |

2

3

4 Peak list for  $\alpha$ 2,3 C9-azido-sialyllactose species

| m/z      | I %  | I %<br>deconvolute | 510.7623 | 0.7  | 0.7 | 520.2638 | 9.2 | 1   |
|----------|------|--------------------|----------|------|-----|----------|-----|-----|
| 500.236  | 0.8  | 0.8                | 510.7852 | 0.8  | 0.8 | 520.5976 | 6.6 | 1   |
| 500.2775 | 1.8  | 1.8                | 511.2473 | 1.4  | 1.4 | 520.7365 | 1.1 | 1.1 |
| 500.351  | 0.9  | 0.9                | 511.3621 | 0.7  | 0.7 | 520.9318 | 3.4 | 3.4 |
| 500.753  | 1.5  | 1.5                | 511.7458 | 0.7  | 0.7 | 521.2232 | 2.2 | 2.2 |
| 501.2404 | 4.5  | 4.5                | 512.2544 | 11.3 | 1   | 521.2658 | 2.3 | 2.3 |
| 501.3085 | 1.5  | 1.5                | 512.5888 | 8.4  | 1   | 521.3307 | 2.7 | 2.7 |
| 501.7534 | 0.7  | 0.7                | 512.9231 | 3.8  | 3.8 | 522.2256 | 0.8 | 0.8 |
| 501.7534 | 0.7  | 0.7                | 513.1917 | 0.7  | 0.7 | 522.2771 | 1.6 | 1.6 |
| 502.2343 | 1.8  | 1.8                | 513.2581 | 1.9  | 1.9 | 522.3267 | 1.7 | 1.7 |
| 502.2697 | 5.2  | 5.2                | 513.2944 | 0.9  | 0.9 | 522.7746 | 0.6 | 0.6 |
| 502.3192 | 17.4 | 1                  | 514.2582 | 2.5  | 2.5 | 523.2489 | 1.8 | 1.8 |
| 502.4812 | 1.7  | 1.7                | 514.5552 | 4.4  | 4.4 | 523.3277 | 1.3 | 1.3 |
| 502.7494 | 4.6  | 4.6                | 514.5896 | 5.2  | 5.2 | 523.7544 | 1   | 1   |
| 503.2095 | 0.8  | 0.8                | 514.7224 | 7.6  | 7.6 | 524.2423 | 16  | 1   |
| 503.2527 | 4.2  | 4.2                | 514.7861 | 5.7  | 5.7 | 524.2983 | 1   | 1   |
| 503.3223 | 4.7  | 4.7                | 514.8894 | 6.5  | 6.5 | 524.4196 | 0.8 | 0.8 |
| 503.7614 | 1.7  | 1.7                | 514.9228 | 4.1  | 4.1 | 524.6195 | 0.7 | 0.7 |
| 504.2546 | 1.3  | 1.3                | 515.0558 | 4.5  | 4.5 | 524.7056 | 1.3 | 1.3 |
| 504.3243 | 1    | 1                  | 515.2245 | 2.9  | 2.9 | 525.2544 | 3.1 | 3.1 |
| 504.5715 | 0.8  | 0.8                | 515.2544 | 2.3  | 2.3 | 525.5111 | 0.7 | 0.7 |
| 505.2451 | 1.8  | 1.8                | 515.287  | 3.2  | 3.2 | 525.764  | 3.4 | 3.4 |
| 505.9088 | 0.6  | 0.6                | 515.317  | 1    | 1   | 525.9092 | 1.4 | 1.4 |
| 506.2638 | 3.3  | 3.3                | 515.3899 | 1.1  | 1.1 | 526.2494 | 2.4 | 2.4 |
| 506.7717 | 1.3  | 1.3                | 515.5891 | 0.8  | 0.8 | 526.3003 | 1.4 | 1.4 |
| 507.2641 | 1.1  | 1.1                | 515.7877 | 1.2  | 1.2 | 526.7621 | 0.6 | 0.6 |
| 507.7694 | 1    | 1                  | 516.2536 | 2    | 2   | 527.276  | 9.1 | 1   |
| 507.8682 | 1    | 1                  | 516.3052 | 3.4  | 3.4 | 527.6106 | 7.5 | 1   |
| 508.2039 | 1.1  | 1.1                | 516.5821 | 0.6  | 0.6 | 527.734  | 1   | 1   |
| 508.2507 | 1.9  | 1.9                | 516.7585 | 0.9  | 0.9 | 527.9443 | 4   | 4   |
| 508.2915 | 3.4  | 3.4                | 517.2545 | 2.1  | 2.1 | 528.224  | 3.6 | 1   |
| 508.585  | 1.1  | 1.1                | 517.3027 | 8.3  | 8.3 | 528.2775 | 1.8 | 1.8 |
| 508.7632 | 0.8  | 0.8                | 517.7605 | 2.2  | 2.2 | 528.7249 | 1.9 | 1.9 |
| 508.7942 | 1.2  | 1.2                | 518.2581 | 2.4  | 2.4 | 528.9065 | 1.2 | 1.2 |
| 508.9168 | 1.1  | 1.1                | 518.3032 | 2.1  | 2.1 | 529.2349 | 1   | 1   |
| 509.248  | 1.6  | 1.6                | 518.7612 | 0.7  | 0.7 | 529.3718 | 3.9 | 1   |
| 510.2605 | 3.1  | 3.1                | 519.1685 | 0.8  | 0.8 | 529.7604 | 7.8 | 1   |
| 510.3606 | 2    | 2                  | 519.2605 | 1.1  | 1.1 | 530.2593 | 4.8 | 1   |
| 510.73   | 0.9  | 0.9                | 519.7847 | 0.6  | 0.6 | 530.3256 | 5.7 | 1   |



|          |      |     |          |      |     |          |      |     |
|----------|------|-----|----------|------|-----|----------|------|-----|
| 530.3748 | 1.3  | 1.3 | 548.0653 | 1.6  | 1.6 | 574.2893 | 4.5  | 4.5 |
| 530.5558 | 0.7  | 0.7 | 548.2699 | 0.9  | 0.9 | 574.3502 | 1.2  | 1.2 |
| 530.6958 | 0.9  | 0.9 | 548.8511 | 0.7  | 0.7 | 574.6274 | 1.7  | 1.7 |
| 530.7603 | 2.1  | 2.1 | 548.9955 | 1    | 1   | 574.7833 | 3.8  | 3.8 |
| 530.8388 | 0.9  | 0.9 | 549.1382 | 0.8  | 0.8 | 574.9626 | 1.6  | 1.6 |
| 530.984  | 0.6  | 0.6 | 549.2609 | 9.2  | 1   | 575.2071 | 0.7  | 0.7 |
| 531.2744 | 3.2  | 1   | 549.7622 | 5    | 1   | 575.2898 | 3.8  | 3.8 |
| 531.307  | 3.1  | 3.1 | 550.2563 | 3.5  | 3.5 | 575.6119 | 80.4 | 1   |
| 531.7726 | 1.5  | 1.5 | 550.5018 | 1    | 1   | 575.7879 | 1.3  | 1.3 |
| 532.2699 | 1.5  | 1.5 | 550.602  | 1.4  | 1.4 | 575.9462 | 69.3 | 1   |
| 532.3091 | 1.1  | 1.1 | 550.7549 | 1.9  | 1.9 | 576.2373 | 0.6  | 0.6 |
| 532.607  | 0.9  | 0.9 | 550.9337 | 1.4  | 1.4 | 576.2821 | 42.4 | 1   |
| 532.756  | 2.6  | 2.6 | 551.2759 | 1.9  | 1.9 | 576.6147 | 13.3 | 1   |
| 532.9407 | 0.7  | 0.7 | 551.8177 | 3    | 3   | 576.7933 | 1.5  | 1.5 |
| 533.2508 | 2.3  | 2.3 | 552.2983 | 18.9 | 1   | 576.9487 | 3.8  | 3.8 |
| 533.321  | 0.9  | 0.9 | 552.6051 | 1.3  | 1.3 | 577.2816 | 3.7  | 3.7 |
| 533.7632 | 1.3  | 1.3 | 552.7633 | 0.6  | 0.6 | 577.6247 | 16.1 | 1   |
| 533.7994 | 8.1  | 8.1 | 552.82   | 0.6  | 0.6 | 577.9589 | 15.3 | 1   |
| 534.2994 | 8.7  | 8.7 | 552.9396 | 1    | 1   | 578.2923 | 8.7  | 1   |
| 534.7521 | 1    | 1   | 553.3009 | 5.8  | 1   | 578.6276 | 3    | 3   |
| 534.7999 | 1.4  | 1.4 | 554.2505 | 1.6  | 1.6 | 578.9608 | 0.8  | 0.8 |
| 534.9286 | 0.7  | 0.7 | 554.2995 | 1.3  | 1.3 | 579.2754 | 0.7  | 0.7 |
| 535.2561 | 1.5  | 1.5 | 554.5833 | 1.1  | 1.1 | 579.7914 | 0.7  | 0.7 |
| 535.3006 | 1.7  | 1.7 | 556.2995 | 0.8  | 0.8 | 580.3042 | 6    | 6   |
| 536.1944 | 1.8  | 1.8 | 557.2717 | 0.7  | 0.7 | 580.8047 | 1.1  | 1.1 |
| 536.2665 | 1.2  | 1.2 | 557.7575 | 1.3  | 1.3 | 581.295  | 2.8  | 2.8 |
| 536.3107 | 0.9  | 0.9 | 558.2598 | 1.6  | 1.6 | 581.5561 | 1.4  | 1.4 |
| 536.7341 | 0.9  | 0.9 | 558.3141 | 0.9  | 0.9 | 581.7973 | 0.9  | 0.9 |
| 537.1964 | 0.6  | 0.6 | 559.2714 | 1.3  | 1.3 | 581.8906 | 1.2  | 1.2 |
| 537.2633 | 1.3  | 1.3 | 559.3176 | 2.2  | 2.2 | 582.2265 | 0.7  | 0.7 |
| 537.7634 | 0.8  | 0.8 | 559.7771 | 0.7  | 0.7 | 582.2921 | 1.3  | 1.3 |
| 537.9178 | 0.7  | 0.7 | 560.2492 | 1    | 1   | 582.938  | 0.7  | 0.7 |
| 538.2585 | 7.8  | 1   | 560.3021 | 1.5  | 1.5 | 583.2696 | 0.9  | 0.9 |
| 539.2619 | 2.6  | 2.6 | 560.4367 | 0.6  | 0.6 | 583.3027 | 0.8  | 0.8 |
| 539.9289 | 0.9  | 0.9 | 560.9451 | 0.7  | 0.7 | 583.6008 | 0.6  | 0.6 |
| 540.264  | 1.6  | 1.6 | 561.3016 | 9.3  | 1   | 584.2726 | 0.8  | 0.8 |
| 541.2756 | 34.3 | 1   | 561.8112 | 1.8  | 1.8 | 584.3321 | 0.9  | 0.9 |
| 541.6049 | 0.6  | 0.6 | 562.3047 | 3    | 3   | 584.6068 | 3.2  | 3.2 |
| 541.7343 | 2.2  | 2.2 | 563.2289 | 1.3  | 1.3 | 584.9422 | 2.9  | 2.9 |
| 541.7771 | 18.9 | 1   | 563.3247 | 21.7 | 1   | 585.2983 | 43.6 | 1   |
| 541.9087 | 1.9  | 1.9 | 563.7457 | 0.7  | 0.7 | 585.3667 | 13   | 1   |
| 541.9554 | 1.5  | 1.5 | 564.275  | 1.1  | 1.1 | 585.6121 | 1    | 1   |
| 542.0755 | 1.8  | 1.8 | 564.3276 | 6.9  | 1   | 585.8    | 25.8 | 1   |
| 542.2381 | 2.1  | 2.1 | 565.2636 | 5.9  | 1   | 586.3012 | 11   | 1   |
| 542.2797 | 6.8  | 6.8 | 565.3095 | 3.5  | 3.5 | 586.3676 | 5    | 1   |
| 542.4094 | 0.8  | 0.8 | 565.7651 | 3.5  | 3.5 | 586.8004 | 4    | 4   |
| 542.627  | 0.7  | 0.7 | 565.8092 | 1.7  | 1.7 | 587.3027 | 1.2  | 1.2 |
| 542.7788 | 1.7  | 1.7 | 566.27   | 1.8  | 1.8 | 587.3473 | 4.8  | 4.8 |
| 543.2744 | 1    | 1   | 566.7738 | 0.8  | 0.8 | 588.2681 | 1.4  | 1.4 |
| 543.7553 | 5.2  | 1   | 567.2773 | 1.1  | 1.1 | 588.3306 | 27.8 | 1   |
| 543.9424 | 3    | 3   | 567.7768 | 1.1  | 1.1 | 588.5968 | 0.9  | 0.9 |
| 544.0594 | 0.9  | 0.9 | 568.2352 | 0.6  | 0.6 | 589.3309 | 9.4  | 1   |
| 544.2815 | 14.1 | 1   | 568.279  | 0.9  | 0.9 | 590.2829 | 4.6  | 4.6 |
| 544.61   | 1.2  | 1.2 | 568.7932 | 0.7  | 0.7 | 590.3303 | 2    | 2   |
| 544.7475 | 2.6  | 2.6 | 569.2728 | 1.1  | 1.1 | 590.7839 | 2.4  | 2.4 |
| 544.9117 | 4.7  | 4.7 | 569.6089 | 1    | 1   | 590.8125 | 1    | 1   |
| 545.0776 | 5    | 5   | 569.9413 | 1.3  | 1.3 | 591.2882 | 2    | 2   |
| 545.2474 | 3.8  | 3.8 | 570.2795 | 1.6  | 1.6 | 591.3167 | 3.6  | 3.6 |
| 545.2872 | 4.4  | 4.4 | 570.7323 | 1.1  | 1.1 | 592.2315 | 1.3  | 1.3 |
| 545.3595 | 0.6  | 0.6 | 570.7844 | 0.6  | 0.6 | 592.2842 | 0.7  | 0.7 |
| 545.4107 | 2.1  | 2.1 | 570.9335 | 0.8  | 0.8 | 592.3179 | 1    | 1   |
| 545.5814 | 1.1  | 1.1 | 571.2669 | 4.2  | 4.2 | 593.2474 | 1.2  | 1.2 |
| 545.7609 | 0.7  | 0.7 | 571.3057 | 1.8  | 1.8 | 593.3274 | 0.6  | 0.6 |
| 546.2702 | 4.4  | 4.4 | 571.596  | 0.8  | 0.8 | 593.5837 | 1.1  | 1.1 |
| 546.7705 | 2.3  | 2.3 | 572.2698 | 1.2  | 1.2 | 593.7955 | 0.8  | 0.8 |
| 547.2666 | 1.3  | 1.3 | 572.3029 | 0.9  | 0.9 | 593.9188 | 0.7  | 0.7 |
| 547.4627 | 2.2  | 2.2 | 572.3478 | 1.1  | 1.1 | 594.0222 | 0.7  | 0.7 |
| 547.5837 | 0.7  | 0.7 | 573.2888 | 1.4  | 1.4 | 594.2741 | 1.2  | 1.2 |
| 547.6639 | 2.6  | 2.6 | 573.3195 | 1.1  | 1.1 | 594.5247 | 0.7  | 0.7 |
| 547.8645 | 2.3  | 2.3 | 573.3538 | 1.2  | 1.2 | 595.2768 | 3    | 3   |

|          |      |      |          |      |     |          |      |      |
|----------|------|------|----------|------|-----|----------|------|------|
| 595.5968 | 0.8  | 0.8  | 623.3459 | 5.4  | 1   | 661.3869 | 1.1  | 1.1  |
| 596.2847 | 2.1  | 2.1  | 624.3137 | 1.6  | 1.6 | 662.2862 | 1    | 1    |
| 596.7902 | 0.8  | 0.8  | 624.3474 | 2    | 2   | 662.339  | 1.5  | 1.5  |
| 597.2886 | 1.3  | 1.3  | 624.8196 | 1.1  | 1.1 | 663.3207 | 2.9  | 2.9  |
| 597.4616 | 1    | 1    | 625.3026 | 0.8  | 0.8 | 664.2998 | 17.3 | 1    |
| 597.6285 | 1.2  | 1.2  | 625.7995 | 1.2  | 1.2 | 665.304  | 6.2  | 6.2  |
| 597.7935 | 1.1  | 1.1  | 626.2996 | 1    | 1   | 666.3398 | 10.5 | 1    |
| 598.3098 | 1.1  | 1.1  | 627.3771 | 5.6  | 1   | 667.343  | 4    | 4    |
| 599.3189 | 2.3  | 2.3  | 628.272  | 0.6  | 0.6 | 668.3447 | 1.2  | 1.2  |
| 599.6531 | 1.7  | 1.7  | 628.3788 | 1.8  | 1.8 | 670.305  | 6.4  | 1    |
| 599.9872 | 0.9  | 0.9  | 629.3847 | 0.8  | 0.8 | 670.8062 | 4.1  | 4.1  |
| 600.3389 | 1.3  | 1.3  | 629.8319 | 0.7  | 0.7 | 671.3082 | 2    | 2    |
| 601.2757 | 1.6  | 1.6  | 630.2414 | 0.9  | 0.9 | 671.8092 | 0.7  | 0.7  |
| 601.3619 | 11.2 | 1    | 630.3046 | 1.5  | 1.5 | 672.3982 | 1    | 1    |
| 601.791  | 0.7  | 0.7  | 630.3657 | 1.3  | 1.3 | 673.3563 | 1.4  | 1.4  |
| 602.2852 | 1.1  | 1.1  | 630.4913 | 0.9  | 0.9 | 674.3545 | 0.7  | 0.7  |
| 602.364  | 3.6  | 3.6  | 630.6159 | 0.6  | 0.6 | 675.9702 | 0.7  | 0.7  |
| 602.7912 | 0.9  | 0.9  | 631.3172 | 1.1  | 1.1 | 676.3073 | 1    | 1    |
| 602.9848 | 3.8  | 3.8  | 632.3393 | 6.2  | 1   | 677.3558 | 1.6  | 1.6  |
| 603.321  | 5.3  | 5.3  | 633.3436 | 2    | 2   | 678.3101 | 0.8  | 0.8  |
| 603.6528 | 2.1  | 2.1  | 634.3377 | 2.4  | 2.4 | 678.3555 | 1    | 1    |
| 603.9867 | 0.9  | 0.9  | 634.7881 | 0.9  | 0.9 | 679.3046 | 0.9  | 0.9  |
| 604.2726 | 0.7  | 0.7  | 635.2893 | 1.3  | 1.3 | 679.3716 | 3.5  | 3.5  |
| 604.3256 | 1.1  | 1.1  | 635.3434 | 0.8  | 0.8 | 680.3721 | 1.5  | 1.5  |
| 604.775  | 0.7  | 0.7  | 638.2947 | 0.8  | 0.8 | 680.4431 | 1.7  | 1.7  |
| 605.2714 | 0.6  | 0.6  | 638.3454 | 0.8  | 0.8 | 680.5897 | 2.8  | 2.8  |
| 605.7766 | 0.8  | 0.8  | 638.7958 | 0.7  | 0.7 | 680.7326 | 4.7  | 4.7  |
| 606.2792 | 0.6  | 0.6  | 639.3228 | 0.6  | 0.6 | 680.8732 | 4.8  | 4.8  |
| 607.2914 | 0.7  | 0.7  | 640.1603 | 0.8  | 0.8 | 681.0184 | 3.5  | 3.5  |
| 608.3111 | 3.3  | 3.3  | 640.3249 | 1.5  | 1.5 | 681.1616 | 2.3  | 2.3  |
| 608.9831 | 0.8  | 0.8  | 640.4939 | 0.8  | 0.8 | 681.305  | 1.5  | 1.5  |
| 609.2958 | 6.5  | 1    | 641.3    | 0.7  | 0.7 | 681.3415 | 4    | 4    |
| 609.3271 | 7.2  | 7.2  | 643.3394 | 13.1 | 1   | 681.4451 | 1    | 1    |
| 610.2976 | 2.1  | 2.1  | 643.4081 | 4.4  | 4.4 | 682.2989 | 1.2  | 1.2  |
| 610.3303 | 2.5  | 2.5  | 644.3444 | 4.9  | 4.9 | 682.3468 | 2.1  | 2.1  |
| 611.3018 | 0.8  | 0.8  | 644.3971 | 2    | 2   | 683.3511 | 0.7  | 0.7  |
| 611.3376 | 0.7  | 0.7  | 645.3506 | 1.8  | 1.8 | 684.0778 | 5.2  | 1    |
| 611.7547 | 0.7  | 0.7  | 645.8081 | 1.5  | 1.5 | 684.3283 | 8.8  | 1    |
| 613.2619 | 0.7  | 0.7  | 646.3113 | 1.3  | 1.3 | 684.5788 | 6.7  | 1    |
| 613.3044 | 10.8 | 10.8 | 646.3465 | 4.4  | 4.4 | 684.8289 | 4    | 4    |
| 613.7815 | 9.9  | 9.9  | 647.3482 | 1.9  | 1.9 | 685.0798 | 1.9  | 1.9  |
| 614.2863 | 6    | 6    | 648.3266 | 0.9  | 0.9 | 685.332  | 1    | 1    |
| 614.4029 | 3.7  | 3.7  | 648.8437 | 6.5  | 1   | 685.3935 | 3.8  | 3.8  |
| 614.7844 | 2.6  | 2.6  | 649.2761 | 0.8  | 0.8 | 685.4293 | 2.9  | 2.9  |
| 615.2965 | 1    | 1    | 649.3443 | 4.6  | 4.6 | 686.2622 | 0.6  | 0.6  |
| 615.4051 | 1.3  | 1.3  | 649.8459 | 1.8  | 1.8 | 686.358  | 0.7  | 0.7  |
| 615.8207 | 2.6  | 2.6  | 650.2881 | 0.7  | 0.7 | 686.4008 | 1.6  | 1.6  |
| 616.3289 | 2.1  | 2.1  | 650.3462 | 2.7  | 2.7 | 686.862  | 0.7  | 0.7  |
| 616.3724 | 4.5  | 4.5  | 650.844  | 2.1  | 2.1 | 687.3735 | 5.4  | 5.4  |
| 616.7975 | 0.8  | 0.8  | 651.3496 | 1.4  | 1.4 | 688.3842 | 2.2  | 2.2  |
| 617.2652 | 4.4  | 4.4  | 652.3183 | 2.7  | 2.7 | 689.3855 | 0.7  | 0.7  |
| 617.3345 | 2.2  | 2.2  | 652.8291 | 1    | 1   | 691.3247 | 2.4  | 2.4  |
| 617.3731 | 1.5  | 1.5  | 653.3238 | 1.3  | 1.3 | 692.3261 | 0.9  | 0.9  |
| 617.4654 | 6.7  | 1    | 653.4919 | 4.6  | 4.6 | 693.3521 | 0.7  | 0.7  |
| 617.6654 | 6.1  | 1    | 653.6914 | 9.3  | 1   | 694.3482 | 2    | 2    |
| 617.8662 | 4    | 4    | 653.7979 | 0.9  | 0.9 | 694.8071 | 15   | 15   |
| 618.0659 | 2.4  | 2.4  | 653.8205 | 0.9  | 0.9 | 695.3085 | 10.6 | 10.6 |
| 618.2667 | 1.4  | 1.4  | 653.8914 | 9.8  | 1   | 695.8097 | 4.5  | 4.5  |
| 618.3307 | 9.3  | 1    | 654.0914 | 7.8  | 1   | 696.3195 | 2.4  | 2.4  |
| 618.6436 | 0.8  | 0.8  | 654.2919 | 5.1  | 1   | 697.3258 | 0.9  | 0.9  |
| 618.8114 | 1.2  | 1.2  | 654.3683 | 0.9  | 0.9 | 700.3406 | 1.2  | 1.2  |
| 618.9781 | 1.6  | 1.6  | 654.4918 | 2    | 2   | 701.3499 | 0.6  | 0.6  |
| 619.1448 | 1    | 1    | 654.6924 | 1    | 1   | 701.4136 | 0.9  | 0.9  |
| 619.3196 | 11   | 1    | 655.2731 | 0.6  | 0.6 | 702.3709 | 1.1  | 1.1  |
| 620.2795 | 2.9  | 2.9  | 656.3919 | 0.8  | 0.8 | 703.3566 | 10.3 | 1    |
| 620.3243 | 3.8  | 3.8  | 658.3829 | 2    | 2   | 704.3609 | 4    | 4    |
| 620.7801 | 1.8  | 1.8  | 659.3274 | 1    | 1   | 705.3244 | 0.9  | 0.9  |
| 621.2868 | 1    | 1    | 659.3891 | 0.8  | 0.8 | 705.3601 | 1.2  | 1.2  |
| 621.3223 | 1.4  | 1.4  | 659.8298 | 0.9  | 0.9 | 705.7994 | 0.7  | 0.7  |
| 623.2957 | 3.8  | 3.8  | 660.3855 | 2.3  | 2.3 | 706.806  | 0.6  | 0.6  |

|          |      |     |          |      |     |          |      |      |
|----------|------|-----|----------|------|-----|----------|------|------|
| 707.3455 | 22.1 | 1   | 768.8805 | 0.7  | 0.7 | 839.4011 | 1.9  | 1.9  |
| 708.3485 | 9.1  | 1   | 769.2836 | 0.9  | 0.9 | 839.5665 | 1.9  | 1.9  |
| 708.3952 | 1.1  | 1.1 | 769.3311 | 1.7  | 1.7 | 839.7327 | 1.4  | 1.4  |
| 709.3507 | 2.3  | 2.3 | 770.3329 | 0.8  | 0.8 | 839.8994 | 0.9  | 0.9  |
| 710.3772 | 3    | 3   | 771.3303 | 1.4  | 1.4 | 839.9852 | 0.7  | 0.7  |
| 710.8792 | 2.2  | 2.2 | 771.4663 | 2.5  | 2.5 | 840.153  | 0.7  | 0.7  |
| 711.3801 | 1    | 1   | 771.5796 | 2    | 2   | 840.3203 | 0.7  | 0.7  |
| 712.3273 | 2.5  | 2.5 | 771.8309 | 1.9  | 1.9 | 846.4594 | 1.7  | 1.7  |
| 713.3305 | 1    | 1   | 772.081  | 1.3  | 1.3 | 847.4629 | 0.9  | 0.9  |
| 714.3316 | 0.7  | 0.7 | 772.3318 | 0.8  | 0.8 | 851.4187 | 14.7 | 14.7 |
| 717.4177 | 0.7  | 0.7 | 772.4509 | 7.2  | 1   | 852.4218 | 6.6  | 6.6  |
| 718.1377 | 0.8  | 0.8 | 773.4507 | 4.1  | 4.1 | 852.8567 | 74.5 | 74.5 |
| 718.2648 | 0.7  | 0.7 | 774.4514 | 1.3  | 1.3 | 853.3582 | 61.1 | 61.1 |
| 719.3353 | 0.6  | 0.6 | 775.3682 | 1.5  | 1.5 | 853.4233 | 2    | 2    |
| 719.4863 | 1    | 1   | 775.4231 | 2.7  | 2.7 | 853.8595 | 30.8 | 30.8 |
| 719.629  | 1.6  | 1.6 | 776.4017 | 4.4  | 4.4 | 854.3609 | 10.9 | 10.9 |
| 719.7722 | 1.6  | 1.6 | 777.4039 | 1.8  | 1.8 | 854.8619 | 3.1  | 3.1  |
| 719.9145 | 1.1  | 1.1 | 778.3981 | 0.7  | 0.7 | 855.364  | 1    | 1    |
| 720.0574 | 0.7  | 0.7 | 786.4413 | 1.6  | 1.6 | 855.4866 | 3.3  | 3.3  |
| 720.1312 | 1.1  | 1.1 | 787.4399 | 1.2  | 1.2 | 856.4887 | 1.4  | 1.4  |
| 720.2734 | 1.6  | 1.6 | 793.3419 | 2.2  | 2.2 | 857.5126 | 6.6  | 6.6  |
| 720.4169 | 1.3  | 1.3 | 793.6872 | 3.2  | 3.2 | 858.4601 | 1    | 1    |
| 720.5594 | 1    | 1   | 793.8535 | 10.1 | 1   | 858.5158 | 3    | 3    |
| 720.7036 | 0.7  | 0.7 | 794.0201 | 16.8 | 1   | 859.5186 | 0.9  | 0.9  |
| 721.2644 | 0.9  | 0.9 | 794.1867 | 17.4 | 1   | 862.9138 | 15.5 | 1    |
| 721.7656 | 1    | 1   | 794.3534 | 14.7 | 1   | 863.4156 | 13.6 | 1    |
| 722.401  | 0.7  | 0.7 | 794.5205 | 9.3  | 1   | 863.8475 | 2.9  | 2.9  |
| 724.3475 | 1.4  | 1.4 | 794.6876 | 5    | 5   | 863.917  | 7.2  | 7.2  |
| 726.8516 | 2    | 2   | 794.8545 | 2.5  | 2.5 | 864.349  | 2.3  | 2.3  |
| 727.3524 | 1.5  | 1.5 | 795.0206 | 1.1  | 1.1 | 864.4182 | 2.6  | 2.6  |
| 727.8208 | 0.7  | 0.7 | 795.3819 | 35.1 | 1   | 864.8459 | 1.4  | 1.4  |
| 727.8519 | 0.6  | 0.6 | 796.385  | 14.4 | 1   | 864.919  | 0.8  | 0.8  |
| 729.2759 | 1.1  | 1.1 | 797.3873 | 3.8  | 3.8 | 865.3423 | 0.7  | 0.7  |
| 729.3263 | 1.3  | 1.3 | 798.3919 | 1    | 1   | 865.9338 | 4.4  | 4.4  |
| 729.6095 | 1.1  | 1.1 | 800.3846 | 0.7  | 0.7 | 866.4346 | 4.5  | 4.5  |
| 729.9443 | 0.6  | 0.6 | 800.4559 | 1.5  | 1.5 | 866.9366 | 2.4  | 2.4  |
| 730.3296 | 1.2  | 1.2 | 801.4759 | 7.5  | 1   | 867.438  | 0.9  | 0.9  |
| 737.3874 | 1.5  | 1.5 | 802.4789 | 3.1  | 3.1 | 869.3514 | 0.9  | 0.9  |
| 738.3351 | 5.5  | 5.5 | 802.839  | 0.7  | 0.7 | 871.8309 | 1.6  | 1.6  |
| 738.8451 | 0.7  | 0.7 | 803.0062 | 0.9  | 0.9 | 872.3323 | 1.4  | 1.4  |
| 739.3454 | 4.6  | 4.6 | 803.1729 | 0.7  | 0.7 | 872.8329 | 0.7  | 0.7  |
| 739.3929 | 0.8  | 0.8 | 803.4853 | 0.7  | 0.7 | 873.4006 | 1.3  | 1.3  |
| 740.3501 | 1.6  | 1.6 | 804.3817 | 1.7  | 1.7 | 873.9047 | 1.2  | 1.2  |
| 742.3254 | 35.5 | 1   | 805.3841 | 0.8  | 0.8 | 874.4062 | 1.4  | 1.4  |
| 742.3683 | 0.8  | 0.8 | 816.4399 | 13.6 | 1   | 874.8375 | 0.6  | 0.6  |
| 742.4504 | 0.7  | 0.7 | 816.612  | 1.5  | 1.5 | 875.4094 | 0.7  | 0.7  |
| 742.8268 | 26.3 | 1   | 816.8625 | 3    | 3   | 876.4085 | 1    | 1    |
| 743.3281 | 11.2 | 1   | 817.1124 | 3    | 3   | 876.4591 | 0.8  | 0.8  |
| 743.8295 | 3.8  | 3.8 | 817.3632 | 4.6  | 4.6 | 876.9166 | 1    | 1    |
| 743.9039 | 1.2  | 1.2 | 817.4418 | 7    | 7   | 877.4213 | 0.8  | 0.8  |
| 744.331  | 1.1  | 1.1 | 817.6122 | 1.3  | 1.3 | 878.4659 | 2.8  | 2.8  |
| 744.4269 | 1.9  | 1.9 | 817.8659 | 1    | 1   | 879.3127 | 1.8  | 1.8  |
| 745.4299 | 0.8  | 0.8 | 818.366  | 1    | 1   | 879.4139 | 1.9  | 1.9  |
| 746.3729 | 1.9  | 1.9 | 818.4437 | 2.2  | 2.2 | 879.4697 | 1.4  | 1.4  |
| 746.874  | 1.6  | 1.6 | 819.4383 | 0.7  | 0.7 | 879.8149 | 2    | 2    |
| 747.3755 | 1    | 1   | 820.3002 | 0.7  | 0.7 | 880.317  | 1.2  | 1.2  |
| 748.353  | 1.2  | 1.2 | 820.381  | 0.8  | 0.8 | 880.4191 | 0.7  | 0.7  |
| 749.357  | 0.7  | 0.7 | 820.4417 | 1.1  | 1.1 | 880.8176 | 0.8  | 0.8  |
| 751.3931 | 1.3  | 1.3 | 820.586  | 1.1  | 1.1 | 882.3899 | 0.6  | 0.6  |
| 753.316  | 1.2  | 1.2 | 820.7305 | 0.9  | 0.9 | 885.4201 | 2.9  | 2.9  |
| 753.8174 | 0.9  | 0.9 | 820.872  | 0.9  | 0.9 | 886.4237 | 1.4  | 1.4  |
| 760.4067 | 3.5  | 3.5 | 821.0152 | 0.7  | 0.7 | 887.487  | 5.6  | 5.6  |
| 761.3016 | 0.8  | 0.8 | 823.3876 | 3    | 3   | 888.4967 | 3    | 3    |
| 761.3977 | 1.3  | 1.3 | 824.3902 | 1.3  | 1.3 | 889.3688 | 1    | 1    |
| 762.4064 | 2.1  | 2.1 | 825.3921 | 0.8  | 0.8 | 889.503  | 1.2  | 1.2  |
| 763.4098 | 1.2  | 1.2 | 835.5087 | 0.7  | 0.7 | 889.8717 | 0.8  | 0.8  |
| 765.3808 | 0.7  | 0.7 | 838.4221 | 1    | 1   | 890.372  | 0.6  | 0.6  |
| 767.8782 | 1.8  | 1.8 | 839.0649 | 0.7  | 0.7 | 893.4317 | 1.4  | 1.4  |
| 768.3813 | 1.6  | 1.6 | 839.2321 | 1.4  | 1.4 | 894.4357 | 0.8  | 0.8  |
| 768.7829 | 0.8  | 0.8 | 839.345  | 0.6  | 0.6 | 903.973  | 0.9  | 0.9  |

## 6 Peak list for $\alpha$ 2,6 C5-azido-sialyllactose species

| m/z      | I % | I %<br>deconvolute | 512.7523 | 0.3  | 0.3 | 522.986  | 0.9  | 0.9 |
|----------|-----|--------------------|----------|------|-----|----------|------|-----|
| 500.2871 | 1.7 | 1.7                | 512.7787 | 0.3  | 0.3 | 523.1305 | 0.6  | 0.6 |
| 500.7772 | 0.5 | 0.5                | 512.931  | 0.5  | 0.5 | 523.2856 | 1.7  | 1.7 |
| 501.2495 | 1.1 | 1.1                | 513.2324 | 9.9  | 1   | 523.3345 | 1.1  | 1.1 |
| 501.2799 | 0.7 | 0.7                | 513.2783 | 1.3  | 1.3 | 523.417  | 0.2  | 0.2 |
| 501.3401 | 0.6 | 0.6                | 513.4828 | 10.8 | 1   | 523.5819 | 17.8 | 1   |
| 501.5755 | 0.9 | 0.9                | 513.7333 | 7.6  | 1   | 523.7768 | 0.7  | 0.7 |
| 501.7542 | 0.4 | 0.4                | 513.9247 | 0.2  | 0.2 | 523.9162 | 14.9 | 1   |
| 501.7826 | 0.4 | 0.4                | 513.9834 | 3.6  | 1   | 524.2527 | 15.3 | 1   |
| 501.9098 | 0.6 | 0.6                | 514.2358 | 1.7  | 1.7 | 524.4274 | 0.3  | 0.3 |
| 502.3023 | 6.2 | 1                  | 514.28   | 1.5  | 1.5 | 524.5837 | 3.4  | 1   |
| 502.5095 | 0.4 | 0.4                | 514.484  | 0.6  | 0.6 | 524.7647 | 0.4  | 0.4 |
| 502.5767 | 0.2 | 0.2                | 514.5178 | 0.2  | 0.2 | 524.8287 | 0.2  | 0.2 |
| 502.6026 | 0.2 | 0.2                | 514.5629 | 5.1  | 1   | 524.9174 | 1.2  | 1.2 |
| 502.7637 | 0.6 | 0.6                | 514.7301 | 8.6  | 1   | 525.2678 | 4.7  | 1   |
| 503.0053 | 0.2 | 0.2                | 514.7894 | 1    | 1   | 525.6335 | 0.2  | 0.2 |
| 503.1105 | 0.2 | 0.2                | 514.897  | 7.7  | 1   | 525.6545 | 0.2  | 0.2 |
| 503.2606 | 1.3 | 1.3                | 515.0638 | 5.2  | 1   | 525.7719 | 1.6  | 1.6 |
| 503.3018 | 1.9 | 1.9                | 515.2317 | 2.9  | 1   | 525.9174 | 0.7  | 0.7 |
| 503.7718 | 2   | 1                  | 515.2856 | 0.8  | 0.8 | 526.201  | 0.3  | 0.3 |
| 504.2682 | 1.8 | 1.8                | 515.3318 | 1.4  | 1.4 | 526.2635 | 1.5  | 1.5 |
| 504.4006 | 0.2 | 0.2                | 515.3975 | 1.2  | 1.2 | 526.3    | 0.9  | 0.9 |
| 504.4998 | 0.9 | 0.9                | 515.5654 | 0.6  | 0.6 | 526.5185 | 0.3  | 0.3 |
| 504.5454 | 0.2 | 0.2                | 515.7389 | 0.2  | 0.2 | 526.5864 | 0.3  | 0.3 |
| 504.5991 | 0.7 | 0.7                | 515.7847 | 0.4  | 0.4 | 526.7704 | 0.7  | 0.7 |
| 504.6888 | 0.2 | 0.2                | 516.2602 | 1.1  | 1.1 | 526.9409 | 0.3  | 0.3 |
| 504.7522 | 1.2 | 1.2                | 516.3139 | 1.7  | 1.7 | 527.0153 | 0.3  | 0.3 |
| 504.9307 | 0.4 | 0.4                | 516.5079 | 0.2  | 0.2 | 527.2842 | 59.8 | 1   |
| 505.0007 | 0.5 | 0.5                | 516.5906 | 0.5  | 0.5 | 527.4585 | 0.2  | 0.2 |
| 505.2565 | 3.5 | 1                  | 516.7705 | 0.3  | 0.3 | 527.5112 | 0.2  | 0.2 |
| 505.5909 | 2.1 | 1                  | 516.863  | 0.2  | 0.2 | 527.6185 | 49.6 | 1   |
| 505.7486 | 0.2 | 0.2                | 516.9232 | 0.3  | 0.3 | 527.7483 | 0.3  | 0.3 |
| 505.9246 | 1.1 | 1.1                | 517.0618 | 0.2  | 0.2 | 527.7797 | 0.8  | 0.8 |
| 506.266  | 4.4 | 1                  | 517.2602 | 1.6  | 1.6 | 527.9524 | 25.5 | 1   |
| 506.4587 | 0.2 | 0.2                | 517.3079 | 1.9  | 1.9 | 528.2316 | 3    | 1   |
| 506.5914 | 0.2 | 0.2                | 517.5243 | 1.5  | 1.5 | 528.283  | 22.4 | 1   |
| 506.659  | 0.2 | 0.2                | 517.5783 | 3.1  | 1   | 528.6199 | 3.1  | 1   |
| 506.7783 | 2.5 | 1                  | 517.7713 | 2.1  | 1   | 528.7325 | 1.6  | 1.6 |
| 506.8603 | 0.2 | 0.2                | 517.9098 | 4    | 1   | 528.7886 | 0.5  | 0.5 |
| 506.8909 | 0.7 | 0.7                | 518.0257 | 0.9  | 0.9 | 528.916  | 0.5  | 0.5 |
| 507.226  | 0.8 | 0.8                | 518.2458 | 3.5  | 1   | 528.9531 | 0.9  | 0.9 |
| 507.2741 | 1.9 | 1.9                | 518.2988 | 0.8  | 0.8 | 529.175  | 0.5  | 0.5 |
| 507.5612 | 0.3 | 0.3                | 518.5765 | 1.4  | 1.4 | 529.2835 | 4.4  | 1   |
| 507.783  | 0.9 | 0.9                | 518.7694 | 0.5  | 0.5 | 529.3431 | 1.6  | 1.6 |
| 508.256  | 4.6 | 1                  | 518.7694 | 0.5  | 0.5 | 529.3743 | 1.1  | 1.1 |
| 508.281  | 2.6 | 1                  | 518.91   | 0.6  | 0.6 | 529.5084 | 0.4  | 0.4 |
| 508.7583 | 0.4 | 0.4                | 519.2755 | 1.2  | 1.2 | 529.582  | 0.3  | 0.3 |
| 508.9358 | 0.9 | 0.9                | 519.4918 | 0.3  | 0.3 | 529.7628 | 1.5  | 1.5 |
| 508.9824 | 0.3 | 0.3                | 519.7629 | 0.4  | 0.4 | 529.842  | 0.2  | 0.2 |
| 509.2676 | 1.7 | 1.7                | 519.995  | 0.2  | 0.2 | 529.952  | 0.7  | 0.7 |
| 509.6026 | 0.6 | 0.6                | 520.2556 | 3.2  | 1   | 530.2699 | 1.2  | 1.2 |
| 509.7565 | 0.2 | 0.2                | 520.5161 | 5.5  | 1   | 530.3333 | 3.6  | 1   |
| 509.9356 | 0.4 | 0.4                | 520.6064 | 0.3  | 0.3 | 530.3769 | 0.4  | 0.4 |
| 510.2643 | 1.2 | 1.2                | 520.9393 | 0.2  | 0.2 | 530.6201 | 0.3  | 0.3 |
| 510.2901 | 1.1 | 1.1                | 521.0174 | 3.7  | 1   | 530.7638 | 0.7  | 0.7 |
| 510.4137 | 0.2 | 0.2                | 521.2672 | 2.9  | 1   | 531.2847 | 1.6  | 1.6 |
| 510.5823 | 0.2 | 0.2                | 521.3374 | 0.5  | 0.5 | 531.3286 | 1.7  | 1.7 |
| 510.7439 | 0.5 | 0.5                | 521.5183 | 0.7  | 0.7 | 531.6031 | 0.5  | 0.5 |
| 510.7902 | 0.7 | 0.7                | 521.6116 | 0.8  | 0.8 | 531.7803 | 0.7  | 0.7 |
| 511.2618 | 1.1 | 1.1                | 521.7672 | 0.4  | 0.4 | 531.9362 | 0.3  | 0.3 |
| 511.4552 | 0.2 | 0.2                | 521.9417 | 0.7  | 0.7 | 532.2745 | 1    | 1   |
| 511.6073 | 0.7 | 0.7                | 522.2852 | 1.3  | 1.3 | 532.3268 | 0.6  | 0.6 |
| 511.7505 | 0.3 | 0.3                | 522.3315 | 3.3  | 1   | 532.6154 | 0.9  | 0.9 |
| 511.8999 | 0.3 | 0.3                | 522.558  | 0.6  | 0.6 | 532.7643 | 0.4  | 0.4 |
| 511.9398 | 0.4 | 0.4                | 522.6043 | 0.2  | 0.2 | 532.9497 | 0.8  | 0.8 |
| 512.0605 | 0.2 | 0.2                | 522.7013 | 1.1  | 1.1 | 533.2816 | 1.5  | 1.5 |
| 512.2589 | 1.7 | 1.7                | 522.7841 | 0.6  | 0.6 | 533.3298 | 0.6  | 0.6 |
| 512.5964 | 0.9 | 0.9                | 522.8437 | 1.2  | 1.2 | 533.5325 | 0.4  | 0.4 |
|          |     |                    | 522.9403 | 0.2  | 0.2 | 533.6159 | 0.2  | 0.2 |

|          |      |     |          |     |     |          |      |     |
|----------|------|-----|----------|-----|-----|----------|------|-----|
| 533.7772 | 0.5  | 0.5 | 550.2616 | 4.5 | 1   | 565.7743 | 1.7  | 1.7 |
| 534.2795 | 1.8  | 1.8 | 550.5337 | 0.2 | 0.2 | 565.8181 | 1.2  | 1.2 |
| 534.7656 | 0.2  | 0.2 | 550.6102 | 0.9 | 0.9 | 566.026  | 0.4  | 0.4 |
| 535.2765 | 1    | 1   | 550.7622 | 2.6 | 1   | 566.2804 | 1.1  | 1.1 |
| 535.7765 | 0.4  | 0.4 | 550.9426 | 1   | 1   | 566.3139 | 0.8  | 0.8 |
| 536.1703 | 0.2  | 0.2 | 551.2694 | 1.3 | 1.3 | 566.7828 | 0.5  | 0.5 |
| 536.2625 | 1.9  | 1.9 | 551.609  | 0.3 | 0.3 | 567.2885 | 0.5  | 0.5 |
| 536.3185 | 0.4  | 0.4 | 551.7657 | 0.4 | 0.4 | 567.7848 | 0.3  | 0.3 |
| 536.6086 | 0.3  | 0.3 | 551.8259 | 0.3 | 0.3 | 568.3044 | 1.1  | 1.1 |
| 536.776  | 0.2  | 0.2 | 552.3043 | 0.8 | 0.8 | 568.6446 | 0.8  | 0.8 |
| 536.9426 | 0.2  | 0.2 | 552.6125 | 0.4 | 0.4 | 568.7956 | 0.2  | 0.2 |
| 537.2709 | 0.7  | 0.7 | 552.7576 | 0.3 | 0.3 | 568.8587 | 0.5  | 0.5 |
| 537.6292 | 0.2  | 0.2 | 552.9479 | 0.3 | 0.3 | 568.955  | 0.7  | 0.7 |
| 537.7923 | 0.3  | 0.3 | 553.2783 | 0.6 | 0.6 | 569.0578 | 0.4  | 0.4 |
| 537.9394 | 0.3  | 0.3 | 553.7643 | 0.6 | 0.6 | 569.2876 | 0.9  | 0.9 |
| 538.2902 | 7    | 1   | 554.273  | 0.5 | 0.5 | 569.3218 | 0.9  | 0.9 |
| 538.773  | 0.2  | 0.2 | 554.7044 | 0.2 | 0.2 | 569.4588 | 0.2  | 0.2 |
| 539.2921 | 2.4  | 1   | 554.772  | 0.3 | 0.3 | 569.6204 | 0.6  | 0.6 |
| 539.6018 | 0.2  | 0.2 | 555.2866 | 1.9 | 1.9 | 569.8239 | 0.2  | 0.2 |
| 539.7771 | 0.3  | 0.3 | 555.7882 | 1.1 | 1.1 | 569.9518 | 0.4  | 0.4 |
| 539.9364 | 0.8  | 0.8 | 555.9139 | 0.6 | 0.6 | 570.1474 | 0.2  | 0.2 |
| 540.2715 | 0.9  | 0.9 | 556.0389 | 1.4 | 1.4 | 570.2905 | 1.1  | 1.1 |
| 540.6044 | 0.3  | 0.3 | 556.1643 | 1.8 | 1.8 | 570.3232 | 0.4  | 0.4 |
| 540.768  | 0.3  | 0.3 | 556.2892 | 2.3 | 1   | 570.4347 | 0.2  | 0.2 |
| 541.2837 | 10.1 | 1   | 556.4156 | 1.1 | 1.1 | 570.7901 | 0.4  | 0.4 |
| 541.3429 | 0.3  | 0.3 | 556.54   | 0.6 | 0.6 | 571.2741 | 0.7  | 0.7 |
| 541.3702 | 0.2  | 0.2 | 556.6664 | 0.3 | 0.3 | 571.3157 | 1.1  | 1.1 |
| 541.5163 | 0.2  | 0.2 | 556.7496 | 0.4 | 0.4 | 571.6033 | 0.4  | 0.4 |
| 541.7397 | 2.6  | 1   | 556.7903 | 0.3 | 0.3 | 571.8046 | 0.3  | 0.3 |
| 541.7851 | 5.7  | 1   | 556.9222 | 0.2 | 0.2 | 571.9381 | 0.3  | 0.3 |
| 542.2426 | 1.5  | 1.5 | 557.2585 | 0.5 | 0.5 | 572.2933 | 1.9  | 1.9 |
| 542.2863 | 2.5  | 1   | 557.2961 | 0.6 | 0.6 | 572.3581 | 0.5  | 0.5 |
| 542.7452 | 0.5  | 0.5 | 557.3791 | 0.2 | 0.2 | 572.3746 | 0.5  | 0.5 |
| 542.785  | 0.9  | 0.9 | 557.7653 | 0.4 | 0.4 | 572.6271 | 1.6  | 1.6 |
| 542.8412 | 0.3  | 0.3 | 557.8123 | 0.2 | 0.2 | 572.8019 | 0.3  | 0.3 |
| 543.2434 | 0.5  | 0.5 | 558.2678 | 0.5 | 0.5 | 572.9604 | 1    | 1   |
| 543.2813 | 0.5  | 0.5 | 558.2978 | 0.5 | 0.5 | 573.2963 | 1.1  | 1.1 |
| 543.3222 | 0.3  | 0.3 | 558.3639 | 0.3 | 0.3 | 573.3386 | 4.5  | 1   |
| 543.3633 | 0.9  | 0.9 | 558.7934 | 0.4 | 0.4 | 573.6276 | 0.3  | 0.3 |
| 543.7665 | 0.6  | 0.6 | 559.2954 | 0.4 | 0.4 | 573.7918 | 0.2  | 0.2 |
| 544.0162 | 0.5  | 0.5 | 559.3483 | 2.6 | 1   | 573.9533 | 0.2  | 0.2 |
| 544.2872 | 1.8  | 1.8 | 560.3072 | 1.6 | 1.6 | 574.2967 | 0.9  | 0.9 |
| 544.3633 | 0.3  | 0.3 | 560.3492 | 0.9 | 0.9 | 574.3425 | 1.5  | 1.5 |
| 544.5169 | 0.5  | 0.5 | 560.6248 | 0.6 | 0.6 | 574.6201 | 0.3  | 0.3 |
| 544.7673 | 0.5  | 0.5 | 560.7739 | 0.2 | 0.2 | 574.7821 | 0.3  | 0.3 |
| 544.9329 | 0.6  | 0.6 | 560.9576 | 0.6 | 0.6 | 575.2174 | 0.3  | 0.3 |
| 545.3129 | 11   | 1   | 561.0309 | 0.2 | 0.2 | 575.2962 | 0.6  | 0.6 |
| 545.3676 | 0.8  | 0.8 | 561.252  | 1.3 | 1.3 | 575.6205 | 15.4 | 1   |
| 545.6005 | 0.5  | 0.5 | 561.3101 | 3.2 | 1   | 575.7827 | 0.5  | 0.5 |
| 545.6269 | 0.3  | 0.3 | 561.5322 | 0.2 | 0.2 | 575.9547 | 13.6 | 1   |
| 545.7646 | 0.2  | 0.2 | 561.5848 | 1   | 1   | 576.0314 | 0.3  | 0.3 |
| 545.9333 | 0.2  | 0.2 | 561.6261 | 0.3 | 0.3 | 576.2906 | 9.1  | 1   |
| 546.071  | 1    | 1   | 561.7882 | 0.4 | 0.4 | 576.6231 | 2.6  | 1   |
| 546.2754 | 2.2  | 1   | 561.8185 | 1.2 | 1.2 | 576.8032 | 0.6  | 0.6 |
| 546.3158 | 3.3  | 1   | 561.9186 | 0.5 | 0.5 | 576.9561 | 0.9  | 0.9 |
| 546.3684 | 0.3  | 0.3 | 561.9604 | 0.2 | 0.2 | 577.2859 | 1.7  | 1.7 |
| 546.472  | 1.2  | 1.2 | 562.3145 | 1.2 | 1.2 | 577.335  | 0.8  | 0.8 |
| 546.6723 | 0.8  | 0.8 | 562.6259 | 0.2 | 0.2 | 577.6314 | 0.5  | 0.5 |
| 546.7774 | 0.5  | 0.5 | 562.7915 | 0.2 | 0.2 | 577.798  | 0.2  | 0.2 |
| 546.8719 | 0.4  | 0.4 | 563.2431 | 0.3 | 0.3 | 577.9669 | 0.4  | 0.4 |
| 547.0717 | 0.2  | 0.2 | 563.3054 | 1.2 | 1.2 | 578.2913 | 0.7  | 0.7 |
| 547.3093 | 1.4  | 1.4 | 563.7565 | 0.2 | 0.2 | 578.7639 | 0.3  | 0.3 |
| 547.6156 | 0.3  | 0.3 | 564.1478 | 0.2 | 0.2 | 578.823  | 0.3  | 0.3 |
| 547.7783 | 0.2  | 0.2 | 564.2807 | 0.9 | 0.9 | 579.0165 | 0.2  | 0.2 |
| 547.9513 | 0.2  | 0.2 | 564.5226 | 0.3 | 0.3 | 579.2803 | 0.9  | 0.9 |
| 548.2872 | 1.2  | 1.2 | 564.7748 | 0.3 | 0.3 | 579.325  | 0.5  | 0.5 |
| 548.81   | 0.2  | 0.2 | 564.9789 | 0.2 | 0.2 | 579.6939 | 0.6  | 0.6 |
| 549.2722 | 1.9  | 1.9 | 565.2721 | 2.5 | 1   | 579.7768 | 0.5  | 0.5 |
| 549.7713 | 1    | 1   | 565.3159 | 3   | 1   | 579.8026 | 0.6  | 0.6 |
| 550.0329 | 0.3  | 0.3 | 565.5266 | 0.4 | 0.4 | 579.8938 | 0.9  | 0.9 |

|          |      |     |          |      |     |          |     |     |
|----------|------|-----|----------|------|-----|----------|-----|-----|
| 580.0941 | 0.8  | 0.8 | 597.0961 | 0.4  | 0.4 | 612.4941 | 0.3 | 0.3 |
| 580.3092 | 1.7  | 1.7 | 597.2927 | 2.3  | 1   | 612.6961 | 0.2 | 0.2 |
| 580.4943 | 0.3  | 0.3 | 597.4943 | 0.2  | 0.2 | 612.802  | 0.2 | 0.2 |
| 580.8144 | 0.3  | 0.3 | 597.6956 | 0.2  | 0.2 | 612.84   | 0.2 | 0.2 |
| 581.303  | 1.4  | 1.4 | 597.7982 | 0.2  | 0.2 | 613.3115 | 0.5 | 0.5 |
| 581.8045 | 0.4  | 0.4 | 597.9012 | 0.4  | 0.4 | 613.7905 | 1.6 | 1.6 |
| 582.298  | 0.6  | 0.6 | 598.1013 | 0.4  | 0.4 | 614.2927 | 1.2 | 1.2 |
| 582.5478 | 3.3  | 1   | 598.2989 | 1.3  | 1.3 | 614.4117 | 1   | 1   |
| 582.6145 | 0.2  | 0.2 | 598.3627 | 0.2  | 0.2 | 614.7957 | 0.7 | 0.7 |
| 582.7988 | 4.2  | 1   | 598.5004 | 0.2  | 0.2 | 615.2987 | 0.7 | 0.7 |
| 582.9503 | 0.2  | 0.2 | 599.3368 | 17.9 | 1   | 615.3871 | 0.5 | 0.5 |
| 583.0493 | 2.7  | 1   | 599.3778 | 1.7  | 1.7 | 615.643  | 0.5 | 0.5 |
| 583.2996 | 1.7  | 1.7 | 599.6643 | 0.5  | 0.5 | 615.8032 | 0.3 | 0.3 |
| 583.5497 | 0.5  | 0.5 | 599.8383 | 10.5 | 1   | 615.9766 | 0.5 | 0.5 |
| 583.7723 | 0.2  | 0.2 | 599.9986 | 0.3  | 0.3 | 616.2749 | 0.8 | 0.8 |
| 583.801  | 0.3  | 0.3 | 600.2623 | 0.3  | 0.3 | 616.3058 | 0.6 | 0.6 |
| 584.2932 | 0.4  | 0.4 | 600.3396 | 4.3  | 1   | 616.3444 | 0.8 | 0.8 |
| 584.3214 | 0.7  | 0.7 | 600.382  | 0.6  | 0.6 | 616.3802 | 1   | 1   |
| 584.6164 | 1.7  | 1.7 | 600.8404 | 1.1  | 1.1 | 616.648  | 0.2 | 0.2 |
| 584.7644 | 0.5  | 0.5 | 600.9566 | 0.2  | 0.2 | 617.0467 | 0.3 | 0.3 |
| 584.796  | 0.2  | 0.2 | 601.2965 | 0.7  | 0.7 | 617.2739 | 6.3 | 1   |
| 584.9514 | 1.8  | 1.8 | 601.3695 | 1.3  | 1.3 | 617.3416 | 0.9 | 0.9 |
| 585.3049 | 3.8  | 1   | 601.801  | 0.4  | 0.4 | 617.474  | 9.6 | 1   |
| 585.375  | 6    | 1   | 601.9715 | 5.5  | 1   | 617.5488 | 0.3 | 0.3 |
| 585.6221 | 0.5  | 0.5 | 602.3058 | 5.6  | 1   | 617.6744 | 8.8 | 1   |
| 585.808  | 2.3  | 1   | 602.3638 | 1.4  | 1.4 | 617.7966 | 0.3 | 0.3 |
| 585.9568 | 0.2  | 0.2 | 602.6403 | 2.8  | 1   | 617.8749 | 6.1 | 1   |
| 586.305  | 2.3  | 1   | 602.8172 | 3.8  | 1   | 618.0751 | 3.1 | 1   |
| 586.3766 | 2.3  | 1   | 602.9933 | 25.8 | 1   | 618.2782 | 1.7 | 1.7 |
| 586.8051 | 1.1  | 1.1 | 603.3271 | 26.4 | 1   | 618.3389 | 3.9 | 1   |
| 587.3091 | 0.6  | 0.6 | 603.6617 | 14.3 | 1   | 618.4756 | 0.6 | 0.6 |
| 587.3555 | 1.5  | 1.5 | 603.8197 | 1    | 1   | 618.6352 | 0.5 | 0.5 |
| 587.8062 | 0.3  | 0.3 | 603.9955 | 6    | 1   | 618.6682 | 0.2 | 0.2 |
| 588.1331 | 0.5  | 0.5 | 604.3288 | 2.5  | 1   | 618.811  | 0.5 | 0.5 |
| 588.3052 | 1.3  | 1.3 | 604.671  | 0.6  | 0.6 | 618.9723 | 0.2 | 0.2 |
| 588.3389 | 7.3  | 1   | 604.7847 | 0.2  | 0.2 | 619.3307 | 2.8 | 1   |
| 588.4671 | 0.9  | 0.9 | 605.012  | 0.6  | 0.6 | 619.7959 | 0.2 | 0.2 |
| 588.6332 | 0.7  | 0.7 | 605.2798 | 0.5  | 0.5 | 620.2887 | 2.2 | 1   |
| 588.8005 | 0.6  | 0.6 | 605.3427 | 0.7  | 0.7 | 620.3293 | 2.5 | 1   |
| 588.966  | 0.3  | 0.3 | 605.7854 | 0.2  | 0.2 | 620.7889 | 1.2 | 1.2 |
| 589.3348 | 10.9 | 1   | 606.3061 | 1.1  | 1.1 | 620.967  | 0.2 | 0.2 |
| 590.2933 | 1.1  | 1.1 | 606.8135 | 2.9  | 1   | 621.2943 | 0.7 | 0.7 |
| 590.3367 | 3.2  | 1   | 607.0654 | 3.1  | 1   | 621.3314 | 1   | 1   |
| 590.5539 | 0.4  | 0.4 | 607.3158 | 2.7  | 1   | 621.7923 | 0.3 | 0.3 |
| 590.6292 | 0.2  | 0.2 | 607.5663 | 1.1  | 1.1 | 621.9819 | 0.4 | 0.4 |
| 590.7998 | 0.7  | 0.7 | 607.8126 | 1    | 1   | 622.0323 | 0.2 | 0.2 |
| 590.964  | 0.2  | 0.2 | 608.0678 | 0.2  | 0.2 | 622.3196 | 0.6 | 0.6 |
| 591.0557 | 0.4  | 0.4 | 608.3188 | 1.7  | 1.7 | 622.6503 | 0.3 | 0.3 |
| 591.2992 | 0.7  | 0.7 | 608.6587 | 0.5  | 0.5 | 622.8262 | 5.4 | 1   |
| 591.3297 | 0.8  | 0.8 | 608.8061 | 0.3  | 0.3 | 622.9813 | 0.2 | 0.2 |
| 591.7705 | 0.2  | 0.2 | 608.9925 | 0.3  | 0.3 | 623.3518 | 5.6 | 1   |
| 592.2937 | 0.4  | 0.4 | 609.3012 | 2    | 2   | 623.8243 | 1.8 | 1.8 |
| 593.3057 | 0.5  | 0.5 | 609.4822 | 1.6  | 1.6 | 624.1661 | 0.2 | 0.2 |
| 593.8071 | 0.3  | 0.3 | 609.6487 | 3.1  | 1   | 624.3226 | 1.6 | 1.6 |
| 594.2967 | 0.4  | 0.4 | 609.8157 | 3.4  | 1   | 624.3558 | 1.9 | 1.9 |
| 594.3374 | 1.1  | 1.1 | 609.9828 | 2.6  | 1   | 624.824  | 0.6 | 0.6 |
| 594.841  | 0.6  | 0.6 | 610.1502 | 1.6  | 1.6 | 625.0641 | 0.2 | 0.2 |
| 595.0563 | 0.2  | 0.2 | 610.3167 | 1.7  | 1.7 | 625.3075 | 0.4 | 0.4 |
| 595.2866 | 25.8 | 1   | 610.4844 | 0.4  | 0.4 | 625.3584 | 0.5 | 0.5 |
| 595.6911 | 0.8  | 0.8 | 610.6536 | 0.4  | 0.4 | 625.794  | 0.3 | 0.3 |
| 595.8005 | 0.2  | 0.2 | 610.7898 | 1    | 1   | 626.2962 | 0.4 | 0.4 |
| 595.8916 | 1.3  | 1.3 | 610.8225 | 0.4  | 0.4 | 626.8014 | 0.2 | 0.2 |
| 595.9675 | 0.3  | 0.3 | 610.9868 | 0.2  | 0.2 | 627.301  | 0.3 | 0.3 |
| 596.092  | 1    | 1   | 611.0391 | 1.1  | 1.1 | 627.3852 | 0.6 | 0.6 |
| 596.2904 | 9.1  | 1   | 611.2509 | 0.2  | 0.2 | 628.3219 | 0.3 | 0.3 |
| 596.4955 | 1.1  | 1.1 | 611.2909 | 1    | 1   | 628.4038 | 0.7 | 0.7 |
| 596.636  | 0.2  | 0.2 | 611.54   | 0.4  | 0.4 | 629.3495 | 0.4 | 0.4 |
| 596.6959 | 0.9  | 0.9 | 611.792  | 0.3  | 0.3 | 629.402  | 0.3 | 0.3 |
| 596.8961 | 0.6  | 0.6 | 612.0947 | 0.2  | 0.2 | 629.777  | 0.7 | 0.7 |
| 596.9879 | 0.2  | 0.2 | 612.296  | 0.5  | 0.5 | 629.8404 | 0.4 | 0.4 |

|          |     |     |          |     |     |          |     |     |
|----------|-----|-----|----------|-----|-----|----------|-----|-----|
| 629.9897 | 0.3 | 0.3 | 652.3272 | 2.5 | 1   | 674.3589 | 0.3 | 0.3 |
| 630.2801 | 0.5 | 0.5 | 652.836  | 0.3 | 0.3 | 674.4182 | 0.2 | 0.2 |
| 630.3298 | 0.6 | 0.6 | 653.3262 | 1   | 1   | 675.2853 | 0.2 | 0.2 |
| 630.6569 | 0.2 | 0.2 | 653.8167 | 0.2 | 0.2 | 675.3469 | 0.5 | 0.5 |
| 630.7798 | 0.2 | 0.2 | 653.8367 | 0.2 | 0.2 | 675.406  | 0.3 | 0.3 |
| 631.3006 | 0.4 | 0.4 | 654.3192 | 0.4 | 0.4 | 675.8423 | 0.3 | 0.3 |
| 631.3409 | 0.6 | 0.6 | 655.2839 | 0.3 | 0.3 | 676.3522 | 0.4 | 0.4 |
| 631.6275 | 0.3 | 0.3 | 655.3207 | 0.2 | 0.2 | 677.3638 | 0.4 | 0.4 |
| 631.9632 | 0.2 | 0.2 | 655.577  | 0.2 | 0.2 | 678.3584 | 0.4 | 0.4 |
| 632.344  | 1.1 | 1.1 | 655.8277 | 0.4 | 0.4 | 679.3745 | 0.3 | 0.3 |
| 632.8271 | 0.3 | 0.3 | 656.0786 | 0.3 | 0.3 | 680.3423 | 0.5 | 0.5 |
| 633.0718 | 0.2 | 0.2 | 656.3265 | 0.3 | 0.3 | 680.4494 | 0.2 | 0.2 |
| 633.3317 | 3.1 | 1   | 656.4012 | 0.3 | 0.3 | 681.35   | 0.3 | 0.3 |
| 633.8328 | 1.9 | 1.9 | 656.8437 | 0.6 | 0.6 | 681.8274 | 0.2 | 0.2 |
| 634.3404 | 1.6 | 1.6 | 657.3435 | 0.6 | 0.6 | 682.3371 | 0.5 | 0.5 |
| 634.7982 | 0.2 | 0.2 | 657.4052 | 0.3 | 0.3 | 682.5872 | 0.5 | 0.5 |
| 634.8369 | 0.3 | 0.3 | 657.8387 | 0.4 | 0.4 | 682.8369 | 0.4 | 0.4 |
| 635.1854 | 0.8 | 0.8 | 658.0006 | 0.2 | 0.2 | 683.0882 | 0.2 | 0.2 |
| 635.3294 | 2.1 | 1   | 658.3915 | 5.5 | 1   | 683.3327 | 0.3 | 0.3 |
| 635.4717 | 2.4 | 1   | 659.3432 | 0.7 | 0.7 | 683.9727 | 3.7 | 1   |
| 635.6153 | 2   | 1   | 659.3942 | 1.9 | 1.9 | 684.3071 | 4.1 | 1   |
| 635.7583 | 1.4 | 1.4 | 659.7007 | 0.2 | 0.2 | 684.6407 | 2.8 | 1   |
| 635.9017 | 0.8 | 0.8 | 659.8436 | 0.4 | 0.4 | 684.9747 | 1.3 | 1.3 |
| 636.0443 | 0.4 | 0.4 | 659.9009 | 0.4 | 0.4 | 685.3087 | 0.7 | 0.7 |
| 636.1887 | 0.2 | 0.2 | 660.1011 | 0.4 | 0.4 | 685.403  | 1.8 | 1.8 |
| 636.3018 | 0.3 | 0.3 | 660.3686 | 4.1 | 1   | 685.4355 | 0.9 | 0.9 |
| 636.3481 | 0.6 | 0.6 | 660.8572 | 1   | 1   | 685.6423 | 0.2 | 0.2 |
| 636.8098 | 0.2 | 0.2 | 661.2998 | 0.3 | 0.3 | 686.2721 | 0.3 | 0.3 |
| 637.3396 | 0.4 | 0.4 | 661.3703 | 1.5 | 1.5 | 686.3691 | 1.3 | 1.3 |
| 637.6473 | 0.2 | 0.2 | 661.8223 | 0.2 | 0.2 | 686.413  | 0.8 | 0.8 |
| 637.8237 | 1.1 | 1.1 | 661.8547 | 0.2 | 0.2 | 686.6045 | 0.2 | 0.2 |
| 637.9813 | 0.2 | 0.2 | 662.2942 | 0.8 | 0.8 | 686.87   | 0.8 | 0.8 |
| 638.2863 | 0.4 | 0.4 | 662.3551 | 0.9 | 0.9 | 687.3809 | 1.6 | 1.6 |
| 638.3232 | 1   | 1   | 662.6879 | 0.3 | 0.3 | 688.3973 | 0.9 | 0.9 |
| 638.8203 | 0.5 | 0.5 | 662.7972 | 0.2 | 0.2 | 688.8243 | 5.1 | 1   |
| 639.0669 | 0.2 | 0.2 | 662.8491 | 0.5 | 0.5 | 689.326  | 3.8 | 1   |
| 639.3247 | 0.4 | 0.4 | 663.0243 | 0.2 | 0.2 | 689.3891 | 0.6 | 0.6 |
| 639.345  | 0.5 | 0.5 | 663.3313 | 0.8 | 0.8 | 689.6961 | 0.6 | 0.6 |
| 639.6447 | 0.2 | 0.2 | 663.8494 | 0.2 | 0.2 | 689.8272 | 1.5 | 1.5 |
| 639.981  | 0.2 | 0.2 | 664.309  | 4.1 | 1   | 690.0304 | 0.7 | 0.7 |
| 640.323  | 0.4 | 0.4 | 664.3452 | 2.1 | 1   | 690.3296 | 0.7 | 0.7 |
| 641.3239 | 0.2 | 0.2 | 664.6609 | 0.3 | 0.3 | 690.3613 | 0.7 | 0.7 |
| 641.3622 | 0.3 | 0.3 | 664.8439 | 0.2 | 0.2 | 690.4027 | 0.4 | 0.4 |
| 642.3196 | 0.3 | 0.3 | 665.0004 | 0.3 | 0.3 | 690.6968 | 0.2 | 0.2 |
| 642.359  | 0.5 | 0.5 | 665.1713 | 0.3 | 0.3 | 690.8277 | 0.3 | 0.3 |
| 642.8324 | 0.3 | 0.3 | 665.3126 | 1.4 | 1.4 | 691.329  | 0.4 | 0.4 |
| 643.2202 | 0.2 | 0.2 | 666.3484 | 1.7 | 1.7 | 692.3611 | 1.7 | 1.7 |
| 643.347  | 1.5 | 1.5 | 667.3105 | 0.3 | 0.3 | 692.6542 | 0.3 | 0.3 |
| 643.4153 | 0.3 | 0.3 | 667.3497 | 0.6 | 0.6 | 692.8616 | 1   | 1   |
| 644.3563 | 0.6 | 0.6 | 668.3132 | 0.5 | 0.5 | 692.9892 | 0.2 | 0.2 |
| 644.4329 | 0.3 | 0.3 | 668.3509 | 0.3 | 0.3 | 693.3643 | 0.6 | 0.6 |
| 644.8397 | 1.9 | 1.9 | 668.8146 | 0.3 | 0.3 | 693.6853 | 1.8 | 1.8 |
| 645.3425 | 1.5 | 1.5 | 669.3505 | 0.4 | 0.4 | 693.8614 | 0.2 | 0.2 |
| 645.8247 | 0.5 | 0.5 | 669.6804 | 0.4 | 0.4 | 694.0194 | 1.9 | 1.9 |
| 646.3543 | 1.4 | 1.4 | 670.0132 | 0.2 | 0.2 | 694.3551 | 7.6 | 1   |
| 646.6136 | 0.2 | 0.2 | 670.3147 | 2   | 1   | 694.6869 | 0.6 | 0.6 |
| 646.8205 | 0.3 | 0.3 | 670.3956 | 3.7 | 1   | 694.8168 | 5.1 | 5.1 |
| 647.3116 | 2.3 | 1   | 670.816  | 1.3 | 1.3 | 695.0213 | 0.2 | 0.2 |
| 647.3535 | 1   | 1   | 671.3297 | 0.6 | 0.6 | 695.3184 | 3.6 | 3.6 |
| 647.7126 | 0.2 | 0.2 | 671.3998 | 1.2 | 1.2 | 695.3575 | 2.4 | 2.4 |
| 647.8129 | 1.4 | 1.4 | 671.8333 | 0.3 | 0.3 | 695.8199 | 1.5 | 1.5 |
| 648.3165 | 0.8 | 0.8 | 672.331  | 0.5 | 0.5 | 696.3698 | 4.4 | 4.4 |
| 648.8528 | 1.4 | 1.4 | 672.4038 | 0.4 | 0.4 | 696.8236 | 0.2 | 0.2 |
| 649.3401 | 1.3 | 1.3 | 672.6646 | 0.3 | 0.3 | 697.3185 | 0.3 | 0.3 |
| 649.8387 | 0.8 | 0.8 | 672.8207 | 0.2 | 0.2 | 697.3727 | 1.5 | 1.5 |
| 650.0521 | 0.2 | 0.2 | 672.999  | 0.2 | 0.2 | 697.8155 | 0.2 | 0.2 |
| 650.3605 | 1   | 1   | 673.3328 | 0.3 | 0.3 | 698.3756 | 0.5 | 0.5 |
| 650.8483 | 0.3 | 0.3 | 673.3663 | 0.6 | 0.6 | 698.8449 | 0.2 | 0.2 |
| 651.3519 | 1.2 | 1.2 | 673.3966 | 0.3 | 0.3 | 699.354  | 0.2 | 0.2 |
| 651.9954 | 0.2 | 0.2 | 674.3028 | 0.2 | 0.2 | 699.4052 | 0.3 | 0.3 |

|          |     |     |          |     |     |          |     |     |
|----------|-----|-----|----------|-----|-----|----------|-----|-----|
| 700.3516 | 0.3 | 0.3 | 722.8575 | 0.3 | 0.3 | 747.3342 | 0.7 | 0.7 |
| 701.0048 | 0.6 | 0.6 | 723.3601 | 0.3 | 0.3 | 747.3686 | 0.3 | 0.3 |
| 701.3563 | 1   | 1   | 724.3636 | 0.5 | 0.5 | 747.7059 | 0.2 | 0.2 |
| 701.4226 | 0.4 | 0.4 | 724.6141 | 0.5 | 0.5 | 747.8422 | 0.5 | 0.5 |
| 701.6741 | 0.5 | 0.5 | 724.8646 | 0.5 | 0.5 | 748.3624 | 0.6 | 0.6 |
| 701.8377 | 0.2 | 0.2 | 725.0179 | 0.2 | 0.2 | 748.8536 | 0.2 | 0.2 |
| 701.8753 | 0.6 | 0.6 | 725.1162 | 0.3 | 0.3 | 749.3847 | 0.4 | 0.4 |
| 702.0098 | 0.2 | 0.2 | 725.3502 | 3.6 | 1   | 749.4259 | 0.3 | 0.3 |
| 702.3264 | 0.6 | 0.6 | 725.6856 | 0.2 | 0.2 | 750.3878 | 0.2 | 0.2 |
| 702.3729 | 0.7 | 0.7 | 725.8496 | 0.2 | 0.2 | 750.7383 | 0.2 | 0.2 |
| 702.4204 | 0.2 | 0.2 | 726.3526 | 1.4 | 1.4 | 750.9393 | 0.2 | 0.2 |
| 702.8266 | 0.3 | 0.3 | 727.3582 | 0.4 | 0.4 | 751.1422 | 0.2 | 0.2 |
| 703.3647 | 0.5 | 0.5 | 728.3707 | 2.2 | 1   | 751.344  | 0.2 | 0.2 |
| 703.4327 | 0.3 | 0.3 | 728.8718 | 1.6 | 1.6 | 751.4014 | 0.5 | 0.5 |
| 703.843  | 0.2 | 0.2 | 729.2862 | 0.5 | 0.5 | 752.3927 | 0.4 | 0.4 |
| 704.3837 | 0.3 | 0.3 | 729.3719 | 0.9 | 0.9 | 752.7257 | 0.3 | 0.3 |
| 705.3396 | 0.8 | 0.8 | 729.4266 | 0.3 | 0.3 | 753.3928 | 0.2 | 0.2 |
| 705.5575 | 0.4 | 0.4 | 729.6191 | 0.4 | 0.4 | 754.3585 | 0.3 | 0.3 |
| 705.7583 | 0.6 | 0.6 | 729.8722 | 0.3 | 0.3 | 755.3566 | 0.2 | 0.2 |
| 705.842  | 0.5 | 0.5 | 729.9535 | 0.3 | 0.3 | 756.3988 | 0.3 | 0.3 |
| 705.9588 | 0.7 | 0.7 | 730.3462 | 0.2 | 0.2 | 757.3807 | 0.6 | 0.6 |
| 706.1593 | 0.5 | 0.5 | 730.3801 | 0.2 | 0.2 | 757.8806 | 0.4 | 0.4 |
| 706.3526 | 0.5 | 0.5 | 730.418  | 0.3 | 0.3 | 758.3824 | 0.3 | 0.3 |
| 706.5588 | 0.2 | 0.2 | 731.1764 | 0.8 | 0.8 | 758.4802 | 1.2 | 1.2 |
| 706.8237 | 0.3 | 0.3 | 731.3776 | 1.7 | 1.7 | 759.4388 | 1.5 | 1.5 |
| 707.3591 | 15  | 1   | 731.5773 | 1.8 | 1.8 | 759.4817 | 0.5 | 0.5 |
| 708.3617 | 5.5 | 1   | 731.7778 | 1.4 | 1.4 | 759.8315 | 0.2 | 0.2 |
| 709.3639 | 1.4 | 1.4 | 731.9767 | 0.9 | 0.9 | 760.331  | 0.2 | 0.2 |
| 710.3852 | 1.7 | 1.7 | 732.1785 | 0.4 | 0.4 | 760.4206 | 1   | 1   |
| 710.8227 | 0.2 | 0.2 | 732.3814 | 0.4 | 0.4 | 761.3248 | 0.4 | 0.4 |
| 710.8886 | 1.2 | 1.2 | 733.3812 | 0.3 | 0.3 | 761.4117 | 0.4 | 0.4 |
| 711.3251 | 0.3 | 0.3 | 734.3767 | 0.2 | 0.2 | 762.4124 | 0.2 | 0.2 |
| 711.3853 | 0.7 | 0.7 | 735.3742 | 0.7 | 0.7 | 762.8991 | 0.4 | 0.4 |
| 711.8901 | 0.2 | 0.2 | 736.3298 | 0.7 | 0.7 | 763.3978 | 0.5 | 0.5 |
| 712.3364 | 0.9 | 0.9 | 736.3774 | 0.3 | 0.3 | 763.8983 | 0.3 | 0.3 |
| 712.3847 | 0.2 | 0.2 | 737.338  | 0.3 | 0.3 | 764.379  | 0.7 | 0.7 |
| 713.0405 | 0.3 | 0.3 | 737.3965 | 1.1 | 1.1 | 765.13   | 0.2 | 0.2 |
| 713.3402 | 0.5 | 0.5 | 738.3442 | 2.5 | 1   | 765.387  | 0.8 | 0.8 |
| 713.3768 | 0.4 | 0.4 | 738.3982 | 0.4 | 0.4 | 766.3997 | 0.4 | 0.4 |
| 713.7098 | 0.2 | 0.2 | 739.3544 | 1.8 | 1.8 | 767.3899 | 0.2 | 0.2 |
| 713.7903 | 0.2 | 0.2 | 740.3591 | 0.6 | 0.6 | 767.8872 | 0.2 | 0.2 |
| 713.8424 | 0.3 | 0.3 | 740.8809 | 0.9 | 0.9 | 768.3899 | 0.3 | 0.3 |
| 713.8839 | 0.4 | 0.4 | 741.0483 | 2.1 | 1   | 769.3419 | 0.2 | 0.2 |
| 714.3437 | 0.4 | 0.4 | 741.2153 | 2.7 | 1   | 771.3394 | 1.8 | 1.8 |
| 714.3828 | 0.5 | 0.5 | 741.3836 | 2.8 | 1   | 771.4742 | 0.2 | 0.2 |
| 714.8155 | 0.3 | 0.3 | 741.5495 | 1.6 | 1.6 | 771.5899 | 3   | 1   |
| 714.8825 | 0.2 | 0.2 | 741.7165 | 1   | 1   | 771.8405 | 2.7 | 1   |
| 715.3121 | 0.2 | 0.2 | 741.8897 | 1.1 | 1.1 | 772.0907 | 1.8 | 1.8 |
| 715.3485 | 0.2 | 0.2 | 742.0512 | 0.2 | 0.2 | 772.3411 | 1   | 1   |
| 715.3884 | 0.2 | 0.2 | 742.3354 | 4.9 | 1   | 772.4595 | 2.1 | 1   |
| 716.3354 | 0.8 | 0.8 | 742.3924 | 0.6 | 0.6 | 772.5918 | 0.4 | 0.4 |
| 716.4322 | 0.7 | 0.7 | 742.4591 | 0.3 | 0.3 | 772.6326 | 0.2 | 0.2 |
| 716.8368 | 0.5 | 0.5 | 742.8367 | 3.6 | 1   | 772.843  | 0.2 | 0.2 |
| 717.3404 | 0.3 | 0.3 | 742.8943 | 0.2 | 0.2 | 773.4555 | 6.4 | 1   |
| 717.4302 | 0.5 | 0.5 | 743.3388 | 1.6 | 1.6 | 773.8772 | 0.2 | 0.2 |
| 718.277  | 0.2 | 0.2 | 743.3999 | 0.6 | 0.6 | 774.4064 | 0.3 | 0.3 |
| 718.3484 | 0.2 | 0.2 | 743.4629 | 0.2 | 0.2 | 774.4587 | 2.6 | 1   |
| 718.397  | 0.2 | 0.2 | 743.8392 | 0.6 | 0.6 | 775.3763 | 0.4 | 0.4 |
| 719.3473 | 0.4 | 0.4 | 744.3623 | 0.4 | 0.4 | 775.4384 | 1.1 | 1.1 |
| 719.4956 | 0.2 | 0.2 | 744.4018 | 0.4 | 0.4 | 776.407  | 1.8 | 1.8 |
| 719.6396 | 0.3 | 0.3 | 744.4366 | 0.5 | 0.5 | 776.7277 | 1   | 1   |
| 719.7832 | 0.3 | 0.3 | 744.6118 | 0.5 | 0.5 | 777.0623 | 0.7 | 0.7 |
| 719.9252 | 0.2 | 0.2 | 744.8621 | 0.4 | 0.4 | 777.4113 | 1   | 1   |
| 720.1402 | 0.2 | 0.2 | 745.115  | 0.4 | 0.4 | 778.414  | 0.4 | 0.4 |
| 720.2848 | 0.3 | 0.3 | 745.3669 | 0.5 | 0.5 | 779.4103 | 0.2 | 0.2 |
| 720.3605 | 0.3 | 0.3 | 745.4121 | 0.2 | 0.2 | 781.3964 | 0.2 | 0.2 |
| 720.4198 | 0.3 | 0.3 | 745.6171 | 0.3 | 0.3 | 782.3976 | 0.2 | 0.2 |
| 720.571  | 0.2 | 0.2 | 745.863  | 0.2 | 0.2 | 783.3786 | 0.5 | 0.5 |
| 721.3717 | 0.3 | 0.3 | 746.3757 | 0.2 | 0.2 | 783.8806 | 0.3 | 0.3 |
| 722.3923 | 0.2 | 0.2 | 746.4059 | 0.3 | 0.3 | 784.3804 | 0.2 | 0.2 |



|          |     |     |          |     |     |          |     |     |
|----------|-----|-----|----------|-----|-----|----------|-----|-----|
| 784.867  | 3.1 | 1   | 809.7515 | 0.2 | 0.2 | 849.4512 | 0.2 | 0.2 |
| 785.3685 | 2.5 | 1   | 810.4435 | 0.3 | 0.3 | 850.4452 | 0.2 | 0.2 |
| 785.8696 | 1.3 | 1.3 | 814.0448 | 0.2 | 0.2 | 851.429  | 1.5 | 1.5 |
| 786.3691 | 0.6 | 0.6 | 814.3811 | 0.4 | 0.4 | 852.4292 | 0.7 | 0.7 |
| 786.46   | 0.6 | 0.6 | 814.5251 | 0.2 | 0.2 | 853.4276 | 0.3 | 0.3 |
| 786.869  | 0.2 | 0.2 | 814.7141 | 0.2 | 0.2 | 855.496  | 0.5 | 0.5 |
| 787.45   | 0.7 | 0.7 | 815.393  | 0.2 | 0.2 | 856.498  | 0.2 | 0.2 |
| 788.3719 | 0.3 | 0.3 | 816.4031 | 0.2 | 0.2 | 857.5213 | 0.4 | 0.4 |
| 788.4247 | 0.5 | 0.5 | 816.4495 | 0.4 | 0.4 | 857.9333 | 0.3 | 0.3 |
| 788.8715 | 0.2 | 0.2 | 817.4454 | 1.1 | 1.1 | 858.4367 | 0.3 | 0.3 |
| 789.4154 | 0.3 | 0.3 | 817.8937 | 0.2 | 0.2 | 858.5249 | 0.2 | 0.2 |
| 790.3529 | 0.2 | 0.2 | 817.9413 | 0.5 | 0.5 | 858.936  | 0.2 | 0.2 |
| 790.4205 | 2.4 | 1   | 818.4475 | 0.6 | 0.6 | 860.4246 | 0.3 | 0.3 |
| 790.9222 | 1.9 | 1.9 | 819.4404 | 0.4 | 0.4 | 860.8651 | 1.5 | 1.5 |
| 791.4227 | 1   | 1   | 820.3115 | 0.2 | 0.2 | 861.3663 | 1.3 | 1.3 |
| 791.9231 | 0.4 | 0.4 | 820.4478 | 0.4 | 0.4 | 861.8683 | 0.6 | 0.6 |
| 792.3636 | 0.2 | 0.2 | 820.5973 | 0.3 | 0.3 | 862.3695 | 0.3 | 0.3 |
| 792.4209 | 0.2 | 0.2 | 820.7397 | 0.3 | 0.3 | 862.4769 | 0.2 | 0.2 |
| 793.2573 | 0.3 | 0.3 | 820.9191 | 0.5 | 0.5 | 862.9247 | 3.1 | 3.1 |
| 793.3523 | 0.5 | 0.5 | 821.4217 | 0.5 | 0.5 | 863.4267 | 3.2 | 3.2 |
| 793.4123 | 1.7 | 1.7 | 821.9221 | 0.2 | 0.2 | 863.9278 | 1.4 | 1.4 |
| 793.7583 | 0.2 | 0.2 | 822.3652 | 0.4 | 0.4 | 864.4296 | 0.8 | 0.8 |
| 793.8649 | 0.2 | 0.2 | 822.409  | 0.3 | 0.3 | 864.9283 | 0.2 | 0.2 |
| 794.0307 | 0.3 | 0.3 | 823.1145 | 0.2 | 0.2 | 865.4477 | 0.2 | 0.2 |
| 794.1984 | 0.2 | 0.2 | 823.3974 | 1.1 | 1.1 | 866.4498 | 0.2 | 0.2 |
| 794.361  | 0.4 | 0.4 | 824.3993 | 0.5 | 0.5 | 874.422  | 0.2 | 0.2 |
| 794.4156 | 0.9 | 0.9 | 824.8759 | 0.2 | 0.2 | 876.4192 | 0.6 | 0.6 |
| 795.3933 | 1   | 1   | 825.4039 | 0.4 | 0.4 | 876.469  | 0.6 | 0.6 |
| 795.4346 | 0.8 | 0.8 | 825.9071 | 0.2 | 0.2 | 876.9203 | 0.6 | 0.6 |
| 796.3958 | 0.5 | 0.5 | 826.4077 | 0.2 | 0.2 | 877.4235 | 0.4 | 0.4 |
| 796.4378 | 0.3 | 0.3 | 828.4344 | 0.2 | 0.2 | 877.4707 | 0.3 | 0.3 |
| 797.4016 | 0.2 | 0.2 | 829.4271 | 0.2 | 0.2 | 878.476  | 1.4 | 1.4 |
| 797.804  | 0.2 | 0.2 | 831.4228 | 0.2 | 0.2 | 879.4251 | 0.3 | 0.3 |
| 798.0032 | 0.2 | 0.2 | 832.4335 | 0.7 | 0.7 | 879.4788 | 0.6 | 0.6 |
| 798.3685 | 0.4 | 0.4 | 833.4367 | 0.4 | 0.4 | 880.482  | 0.2 | 0.2 |
| 798.403  | 0.2 | 0.2 | 834.4452 | 0.3 | 0.3 | 881.9003 | 0.2 | 0.2 |
| 798.8692 | 0.3 | 0.3 | 835.3971 | 0.2 | 0.2 | 882.1954 | 0.2 | 0.2 |
| 799.3752 | 0.4 | 0.4 | 836.4635 | 0.2 | 0.2 | 882.4441 | 0.2 | 0.2 |
| 800.3814 | 0.2 | 0.2 | 837.4947 | 0.3 | 0.3 | 885.4325 | 0.3 | 0.3 |
| 800.4646 | 0.2 | 0.2 | 839.2432 | 0.4 | 0.4 | 886.4331 | 0.2 | 0.2 |
| 800.8465 | 0.5 | 0.5 | 839.4112 | 0.5 | 0.5 | 887.4975 | 1.7 | 1.7 |
| 801.3476 | 0.4 | 0.4 | 839.5772 | 0.5 | 0.5 | 888.5041 | 0.9 | 0.9 |
| 801.4849 | 1   | 1   | 839.7441 | 0.4 | 0.4 | 888.855  | 0.4 | 0.4 |
| 801.8484 | 0.2 | 0.2 | 839.9097 | 0.2 | 0.2 | 889.056  | 0.8 | 0.8 |
| 802.482  | 1.9 | 1.9 | 840.1623 | 0.2 | 0.2 | 889.2563 | 1   | 1   |
| 803.4841 | 0.7 | 0.7 | 840.3264 | 0.2 | 0.2 | 889.4573 | 1   | 1   |
| 804.3516 | 0.2 | 0.2 | 840.4142 | 0.3 | 0.3 | 889.5076 | 0.3 | 0.3 |
| 804.3932 | 0.5 | 0.5 | 840.4898 | 0.2 | 0.2 | 889.6566 | 0.6 | 0.6 |
| 804.4496 | 0.8 | 0.8 | 841.3714 | 0.3 | 0.3 | 889.8586 | 0.4 | 0.4 |
| 805.3965 | 0.3 | 0.3 | 841.4183 | 0.2 | 0.2 | 890.0578 | 0.2 | 0.2 |
| 805.4523 | 0.4 | 0.4 | 841.8718 | 0.2 | 0.2 | 891.4636 | 0.3 | 0.3 |
| 806.3812 | 0.2 | 0.2 | 843.4957 | 0.2 | 0.2 | 892.4295 | 0.3 | 0.3 |
| 807.439  | 6.8 | 1   | 844.4808 | 1.1 | 1.1 | 893.4358 | 0.2 | 0.2 |
| 808.4421 | 3   | 1   | 845.4834 | 0.6 | 0.6 | 895.4166 | 0.2 | 0.2 |
| 808.7488 | 0.5 | 0.5 | 846.4731 | 0.5 | 0.5 | 898.439  | 0.2 | 0.2 |
| 809.0835 | 0.5 | 0.5 | 847.4479 | 1   | 1   | 898.4879 | 0.2 | 0.2 |
| 809.4408 | 1   | 1   | 848.4499 | 0.5 | 0.5 | 900.4486 | 0.4 | 0.4 |

7

8

9 Peak list for  $\alpha$ 2,6 C9-azido-sialyllactose

| m/z      | I % | I %<br>deconvolute |          |      |     |          |     |     |
|----------|-----|--------------------|----------|------|-----|----------|-----|-----|
| 500.2349 | 0.7 | 0.7                | 501.3061 | 0.9  | 0.9 | 503.2519 | 2.2 | 2.2 |
| 500.2762 | 1.8 | 1.8                | 501.3338 | 0.9  | 0.9 | 503.3223 | 3.4 | 3.4 |
| 500.35   | 0.5 | 0.5                | 501.7543 | 0.7  | 0.7 | 503.7634 | 1   | 1   |
| 500.7527 | 1.9 | 1.9                | 502.2674 | 2.6  | 2.6 | 504.2491 | 1.2 | 1.2 |
| 501.2405 | 4   | 4                  | 502.319  | 12.4 | 5   | 504.3238 | 0.7 | 0.7 |
|          |     |                    | 502.7471 | 1    | 1   | 504.5714 | 0.8 | 0.8 |
|          |     |                    | 502.7661 | 1    | 1   | 504.7458 | 0.5 | 0.5 |

|          |      |     |          |      |     |          |     |     |
|----------|------|-----|----------|------|-----|----------|-----|-----|
| 504.905  | 0.7  | 0.7 | 523.3273 | 0.8  | 0.8 | 542.4085 | 0.5 | 0.5 |
| 505.2444 | 1.4  | 1.4 | 523.7571 | 1    | 1   | 542.626  | 0.6 | 0.6 |
| 505.7355 | 0.6  | 0.6 | 524.243  | 7.2  | 1   | 542.7776 | 1.1 | 1.1 |
| 505.9067 | 0.5  | 0.5 | 524.297  | 0.8  | 0.8 | 543.2734 | 0.6 | 0.6 |
| 506.2686 | 2.4  | 2.4 | 524.4187 | 0.5  | 0.5 | 543.7555 | 1.9 | 1.9 |
| 506.7747 | 1.2  | 1.2 | 524.6192 | 0.5  | 0.5 | 543.9415 | 3.6 | 3.6 |
| 507.2082 | 1.1  | 1.1 | 524.7052 | 1    | 1   | 544.0586 | 0.5 | 0.5 |
| 507.268  | 0.9  | 0.9 | 525.2528 | 1.6  | 1.6 | 544.2802 | 9.4 | 1   |
| 507.7742 | 1.1  | 1.1 | 525.5106 | 0.8  | 0.8 | 544.6101 | 1.6 | 1.6 |
| 507.8677 | 0.5  | 0.5 | 525.762  | 1.6  | 1.6 | 544.745  | 1.9 | 1.9 |
| 508.2054 | 0.7  | 0.7 | 525.9089 | 1.6  | 1.6 | 544.7745 | 0.7 | 0.7 |
| 508.2479 | 3    | 3   | 526.0126 | 0.5  | 0.5 | 544.9106 | 3.3 | 3.3 |
| 508.2896 | 2.2  | 2.2 | 526.2458 | 2.1  | 2.1 | 545.077  | 3.6 | 3.6 |
| 508.5848 | 1.2  | 1.2 | 526.2988 | 0.9  | 0.9 | 545.2466 | 2.8 | 2.8 |
| 508.7661 | 0.5  | 0.5 | 526.5779 | 0.7  | 0.7 | 545.2881 | 2.9 | 2.9 |
| 508.7931 | 0.9  | 0.9 | 527.2756 | 11.7 | 1   | 545.36   | 0.5 | 0.5 |
| 508.9163 | 1.3  | 1.3 | 527.6101 | 9.6  | 1   | 545.4104 | 1.4 | 1.4 |
| 509.2485 | 1.9  | 1.9 | 527.7342 | 0.6  | 0.6 | 545.5794 | 0.8 | 0.8 |
| 510.2583 | 1.8  | 1.8 | 527.9439 | 4.8  | 4.8 | 545.7635 | 0.6 | 0.6 |
| 510.3597 | 1.4  | 1.4 | 528.2227 | 2.8  | 2.8 | 546.2703 | 2.2 | 2.2 |
| 510.7851 | 1.4  | 1.4 | 528.277  | 2.2  | 2.2 | 546.7699 | 1.1 | 1.1 |
| 511.2483 | 0.8  | 0.8 | 528.6117 | 0.6  | 0.6 | 547.2635 | 0.7 | 0.7 |
| 511.283  | 1.1  | 1.1 | 528.7245 | 1.5  | 1.5 | 547.4632 | 1.2 | 1.2 |
| 511.7472 | 0.5  | 0.5 | 529.2383 | 0.6  | 0.6 | 547.6635 | 1.6 | 1.6 |
| 512.254  | 4.7  | 4.7 | 529.3691 | 3.9  | 3.9 | 547.8635 | 1.3 | 1.3 |
| 512.5879 | 3.4  | 3.4 | 529.7599 | 4    | 4   | 548.0652 | 0.7 | 0.7 |
| 512.7435 | 0.5  | 0.5 | 530.2587 | 2.6  | 2.6 | 548.2698 | 0.7 | 0.7 |
| 512.7797 | 0.6  | 0.6 | 530.3245 | 3.6  | 3.6 | 548.8521 | 0.6 | 0.6 |
| 512.9223 | 1.6  | 1.6 | 530.3728 | 1.1  | 1.1 | 548.9947 | 0.7 | 0.7 |
| 513.2537 | 0.9  | 0.9 | 530.6954 | 0.6  | 0.6 | 549.2604 | 7.1 | 1   |
| 513.2829 | 0.9  | 0.9 | 530.7605 | 1.1  | 1.1 | 549.7619 | 4   | 4   |
| 513.743  | 0.6  | 0.6 | 531.2796 | 2.1  | 2.1 | 550.2577 | 2.2 | 2.2 |
| 514.2587 | 3.4  | 3.4 | 531.306  | 2.2  | 2.2 | 550.5016 | 0.7 | 0.7 |
| 514.555  | 2.2  | 2.2 | 531.7724 | 1    | 1   | 550.6016 | 1.2 | 1.2 |
| 514.5886 | 6.7  | 1   | 532.2682 | 1.1  | 1.1 | 550.7553 | 1.1 | 1.1 |
| 514.7222 | 3.7  | 3.7 | 532.306  | 0.9  | 0.9 | 550.9351 | 1.1 | 1.1 |
| 514.7854 | 2    | 2   | 532.6058 | 0.7  | 0.7 | 551.281  | 1.2 | 1.2 |
| 514.8888 | 3.4  | 3.4 | 532.7552 | 3.6  | 3.6 | 551.8171 | 1.6 | 1.6 |
| 514.9223 | 5.2  | 1   | 532.9393 | 0.5  | 0.5 | 552.2976 | 8.8 | 1   |
| 515.0557 | 2.5  | 2.5 | 533.2548 | 2.4  | 2.4 | 552.604  | 0.8 | 0.8 |
| 515.2261 | 1.4  | 1.4 | 533.287  | 2    | 2   | 552.7496 | 0.7 | 0.7 |
| 515.2549 | 2.6  | 2.6 | 533.7641 | 1.2  | 1.2 | 552.9386 | 0.7 | 0.7 |
| 515.2859 | 1.2  | 1.2 | 533.7978 | 4    | 4   | 553.2995 | 2.5 | 2.5 |
| 515.3157 | 1.1  | 1.1 | 534.2987 | 4.9  | 4.9 | 554.2497 | 1.2 | 1.2 |
| 515.3899 | 0.5  | 0.5 | 534.7986 | 0.9  | 0.9 | 554.2935 | 0.7 | 0.7 |
| 515.5893 | 1    | 1   | 534.9267 | 0.6  | 0.6 | 554.5825 | 0.8 | 0.8 |
| 515.7836 | 0.5  | 0.5 | 535.2572 | 1.5  | 1.5 | 554.9161 | 0.6 | 0.6 |
| 516.2508 | 1.8  | 1.8 | 535.3005 | 1.1  | 1.1 | 555.2511 | 0.6 | 0.6 |
| 516.3014 | 2    | 2   | 535.5941 | 0.5  | 0.5 | 557.2546 | 0.7 | 0.7 |
| 516.5821 | 0.9  | 0.9 | 536.1938 | 0.9  | 0.9 | 557.7565 | 0.6 | 0.6 |
| 516.916  | 0.5  | 0.5 | 536.2741 | 1    | 1   | 557.7915 | 1.2 | 1.2 |
| 517.2508 | 2    | 2   | 537.2643 | 1    | 1   | 558.2582 | 0.7 | 0.7 |
| 517.3012 | 5.1  | 1   | 537.51   | 0.7  | 0.7 | 558.2939 | 0.9 | 0.9 |
| 517.7598 | 1.6  | 1.6 | 537.7622 | 0.8  | 0.8 | 558.7876 | 0.7 | 0.7 |
| 518.2565 | 1.7  | 1.7 | 537.9211 | 0.6  | 0.6 | 559.2763 | 0.9 | 0.9 |
| 518.301  | 1.3  | 1.3 | 538.2578 | 5.2  | 1   | 559.3162 | 1.5 | 1.5 |
| 518.7607 | 0.6  | 0.6 | 538.7591 | 0.5  | 0.5 | 559.7783 | 0.5 | 0.5 |
| 519.2581 | 0.8  | 0.8 | 539.2625 | 2    | 2   | 560.2504 | 0.6 | 0.6 |
| 520.2632 | 11.7 | 1   | 539.7717 | 0.6  | 0.6 | 560.2954 | 1.3 | 1.3 |
| 520.597  | 9.3  | 1   | 539.9282 | 0.8  | 0.8 | 560.4377 | 0.5 | 0.5 |
| 520.7367 | 0.6  | 0.6 | 540.2603 | 1.5  | 1.5 | 560.5488 | 0.5 | 0.5 |
| 520.9311 | 4.2  | 4.2 | 540.7556 | 0.9  | 0.9 | 560.7803 | 0.5 | 0.5 |
| 521.2213 | 2.2  | 2.2 | 541.2751 | 18.7 | 1   | 561.3031 | 8.6 | 1   |
| 521.2652 | 2.4  | 2.4 | 541.7377 | 0.8  | 0.8 | 561.81   | 3   | 3   |
| 521.3302 | 1.9  | 1.9 | 541.7764 | 10.9 | 1   | 562.3075 | 2.7 | 2.7 |
| 522.225  | 0.7  | 0.7 | 541.9085 | 1.2  | 1.2 | 563.2266 | 0.7 | 0.7 |
| 522.2785 | 1.6  | 1.6 | 541.9568 | 1.2  | 1.2 | 563.3241 | 7.7 | 1   |
| 522.3279 | 0.8  | 0.8 | 542.0749 | 1.4  | 1.4 | 564.274  | 0.7 | 0.7 |
| 522.7775 | 0.9  | 0.9 | 542.2404 | 1.4  | 1.4 | 564.327  | 2.4 | 2.4 |
| 523.2508 | 1.8  | 1.8 | 542.2797 | 3.8  | 3.8 | 565.2633 | 3.5 | 3.5 |

|          |      |     |          |      |     |          |     |     |
|----------|------|-----|----------|------|-----|----------|-----|-----|
| 565.3067 | 2.8  | 2.8 | 588.3298 | 17.6 | 1   | 616.7968 | 0.5 | 0.5 |
| 565.765  | 2    | 2   | 588.5959 | 0.6  | 0.6 | 617.2648 | 2.4 | 2.4 |
| 565.807  | 1.4  | 1.4 | 589.3304 | 6.3  | 1   | 617.3346 | 1.7 | 1.7 |
| 566.2692 | 1.1  | 1.1 | 590.2817 | 3    | 3   | 617.3711 | 0.9 | 0.9 |
| 566.7725 | 0.5  | 0.5 | 590.3289 | 1.4  | 1.4 | 617.4647 | 3.3 | 3.3 |
| 567.2773 | 0.7  | 0.7 | 590.7832 | 1.7  | 1.7 | 617.665  | 3.1 | 3.1 |
| 568.283  | 0.5  | 0.5 | 591.2842 | 1.4  | 1.4 | 617.8653 | 2   | 2   |
| 568.794  | 0.7  | 0.7 | 591.3159 | 2    | 2   | 618.0659 | 1.2 | 1.2 |
| 569.269  | 0.6  | 0.6 | 592.2311 | 0.8  | 0.8 | 618.2654 | 0.9 | 0.9 |
| 569.6083 | 0.7  | 0.7 | 592.2758 | 0.7  | 0.7 | 618.3305 | 6.9 | 1   |
| 569.9402 | 0.7  | 0.7 | 592.3111 | 0.5  | 0.5 | 618.644  | 0.5 | 0.5 |
| 570.2814 | 1.4  | 1.4 | 593.2487 | 0.7  | 0.7 | 618.8088 | 0.7 | 0.7 |
| 570.7316 | 0.7  | 0.7 | 593.5836 | 0.7  | 0.7 | 618.9772 | 0.8 | 0.8 |
| 570.7843 | 0.7  | 0.7 | 593.795  | 1.1  | 1.1 | 619.1445 | 0.6 | 0.6 |
| 571.2654 | 3    | 3   | 594.2742 | 0.7  | 0.7 | 619.3197 | 7.2 | 1   |
| 571.3033 | 1.1  | 1.1 | 594.291  | 0.7  | 0.7 | 619.7899 | 0.5 | 0.5 |
| 571.5954 | 0.9  | 0.9 | 595.2769 | 5.8  | 1   | 620.2793 | 1.5 | 1.5 |
| 572.2687 | 1.2  | 1.2 | 595.5962 | 1    | 1   | 620.3235 | 2.7 | 2.7 |
| 572.3023 | 0.8  | 0.8 | 595.9319 | 0.8  | 0.8 | 620.7799 | 1   | 1   |
| 572.3468 | 0.7  | 0.7 | 596.2813 | 2.4  | 2.4 | 621.2925 | 0.6 | 0.6 |
| 572.8026 | 0.5  | 0.5 | 596.7872 | 0.5  | 0.5 | 621.3215 | 1.1 | 1.1 |
| 573.287  | 1.2  | 1.2 | 597.2843 | 1.1  | 1.1 | 623.2958 | 2   | 2   |
| 573.3192 | 1    | 1   | 597.4619 | 0.6  | 0.6 | 623.3453 | 4   | 4   |
| 573.621  | 0.7  | 0.7 | 597.6274 | 0.7  | 0.7 | 624.3097 | 0.7 | 0.7 |
| 574.2889 | 3.2  | 3.2 | 597.7961 | 0.7  | 0.7 | 624.3473 | 1.4 | 1.4 |
| 574.349  | 1    | 1   | 598.2612 | 0.5  | 0.5 | 624.8201 | 0.5 | 0.5 |
| 574.6245 | 0.7  | 0.7 | 598.3115 | 0.9  | 0.9 | 625.7993 | 0.6 | 0.6 |
| 574.7829 | 2.2  | 2.2 | 599.3188 | 2    | 2   | 626.2983 | 0.5 | 0.5 |
| 574.9606 | 0.5  | 0.5 | 599.6526 | 1.4  | 1.4 | 627.377  | 4.3 | 4.3 |
| 575.2894 | 2.4  | 2.4 | 599.9864 | 0.8  | 0.8 | 628.379  | 1.6 | 1.6 |
| 575.6114 | 43   | 1   | 600.3383 | 0.9  | 0.9 | 629.3777 | 0.6 | 0.6 |
| 575.7865 | 0.7  | 0.7 | 601.2804 | 0.9  | 0.9 | 629.8297 | 1   | 1   |
| 575.9456 | 38.2 | 1   | 601.3615 | 12.9 | 1   | 630.2397 | 0.7 | 0.7 |
| 576.2819 | 25.3 | 1   | 601.7917 | 0.7  | 0.7 | 630.3331 | 1   | 1   |
| 576.6143 | 7.4  | 1   | 602.2884 | 1.1  | 1.1 | 630.3714 | 1   | 1   |
| 576.7912 | 0.9  | 0.9 | 602.3632 | 3.9  | 3.9 | 630.4906 | 0.6 | 0.6 |
| 576.9477 | 2.2  | 2.2 | 602.7904 | 0.9  | 0.9 | 630.6157 | 0.6 | 0.6 |
| 577.2823 | 2.7  | 2.7 | 602.9842 | 5    | 5   | 631.3183 | 1.5 | 1.5 |
| 577.6241 | 21.6 | 1   | 603.3191 | 5.9  | 1   | 632.3374 | 4   | 4   |
| 577.9585 | 19.6 | 1   | 603.6524 | 2.7  | 2.7 | 633.3395 | 1.5 | 1.5 |
| 578.2921 | 10.9 | 1   | 603.9862 | 1.1  | 1.1 | 634.3358 | 1.9 | 1.9 |
| 578.6266 | 3.9  | 3.9 | 604.2697 | 0.7  | 0.7 | 634.788  | 0.6 | 0.6 |
| 578.9598 | 1.1  | 1.1 | 604.3226 | 1    | 1   | 634.83   | 0.5 | 0.5 |
| 579.2896 | 0.5  | 0.5 | 604.772  | 0.5  | 0.5 | 635.2885 | 0.9 | 0.9 |
| 579.3171 | 0.6  | 0.6 | 605.2701 | 0.6  | 0.6 | 635.3401 | 0.7 | 0.7 |
| 579.7923 | 0.9  | 0.9 | 605.3319 | 0.5  | 0.5 | 636.3423 | 0.7 | 0.7 |
| 580.3038 | 2.9  | 2.9 | 605.7768 | 1    | 1   | 638.2369 | 0.5 | 0.5 |
| 580.8063 | 0.5  | 0.5 | 606.2796 | 0.8  | 0.8 | 638.3082 | 0.6 | 0.6 |
| 581.2942 | 2.8  | 2.8 | 607.2923 | 0.6  | 0.6 | 638.346  | 0.7 | 0.7 |
| 581.5561 | 0.7  | 0.7 | 608.3102 | 2.1  | 2.1 | 638.4569 | 0.7 | 0.7 |
| 581.7966 | 1.2  | 1.2 | 608.7945 | 0.5  | 0.5 | 638.5681 | 0.7 | 0.7 |
| 581.8915 | 0.6  | 0.6 | 608.9826 | 0.6  | 0.6 | 638.6793 | 0.6 | 0.6 |
| 582.2935 | 1    | 1   | 609.2951 | 4.3  | 4.3 | 638.7949 | 0.5 | 0.5 |
| 583.2714 | 0.6  | 0.6 | 609.3261 | 4.1  | 4.1 | 640.1594 | 0.7 | 0.7 |
| 583.3003 | 0.6  | 0.6 | 610.2985 | 1.4  | 1.4 | 640.3248 | 1   | 1   |
| 584.2761 | 0.7  | 0.7 | 610.3281 | 1.4  | 1.4 | 640.4926 | 0.6 | 0.6 |
| 584.3304 | 0.5  | 0.5 | 611.2977 | 0.5  | 0.5 | 642.8229 | 0.5 | 0.5 |
| 584.6065 | 1.2  | 1.2 | 611.3383 | 0.5  | 0.5 | 643.3382 | 4.8 | 4.8 |
| 584.944  | 1.9  | 1.9 | 612.2598 | 0.5  | 0.5 | 643.4071 | 2.3 | 2.3 |
| 585.2977 | 25.7 | 1   | 613.2599 | 0.8  | 0.8 | 644.3446 | 1.8 | 1.8 |
| 585.3665 | 9.2  | 1   | 613.3035 | 7.8  | 7.8 | 644.3943 | 1.2 | 1.2 |
| 585.6127 | 1    | 1   | 613.7812 | 6.3  | 6.3 | 645.3517 | 0.9 | 0.9 |
| 585.7992 | 15.7 | 1   | 614.2862 | 4.3  | 4.3 | 645.8086 | 1.7 | 1.7 |
| 585.9453 | 0.5  | 0.5 | 614.4027 | 4.3  | 4.3 | 646.3102 | 1.3 | 1.3 |
| 586.3003 | 6.6  | 1   | 614.7848 | 1.8  | 1.8 | 646.3462 | 2.5 | 2.5 |
| 586.3675 | 3.4  | 3.4 | 615.3054 | 1.1  | 1.1 | 647.3484 | 1.2 | 1.2 |
| 586.7995 | 2.3  | 2.3 | 615.4056 | 1.3  | 1.3 | 648.3267 | 0.5 | 0.5 |
| 587.3049 | 0.8  | 0.8 | 615.6526 | 0.5  | 0.5 | 648.8434 | 5   | 5   |
| 587.3471 | 1.9  | 1.9 | 616.3322 | 1.4  | 1.4 | 649.2781 | 0.5 | 0.5 |
| 588.2657 | 0.9  | 0.9 | 616.3715 | 2.7  | 2.7 | 649.3441 | 3.5 | 3.5 |

|          |      |     |          |      |      |          |      |     |
|----------|------|-----|----------|------|------|----------|------|-----|
| 649.8453 | 1.4  | 1.4 | 686.3994 | 1.1  | 1.1  | 743.829  | 2.3  | 2.3 |
| 650.3487 | 1.9  | 1.9 | 686.8606 | 0.5  | 0.5  | 743.9022 | 0.6  | 0.6 |
| 650.8435 | 1.1  | 1.1 | 687.3737 | 3.4  | 3.4  | 744.3301 | 0.7  | 0.7 |
| 651.3495 | 0.8  | 0.8 | 688.3816 | 1.2  | 1.2  | 744.4253 | 0.9  | 0.9 |
| 652.3193 | 1.8  | 1.8 | 689.3759 | 0.5  | 0.5  | 746.3723 | 1.4  | 1.4 |
| 652.8265 | 0.9  | 0.9 | 690.35   | 0.5  | 0.5  | 746.8719 | 0.9  | 0.9 |
| 653.3204 | 0.8  | 0.8 | 691.3243 | 1    | 1    | 747.3743 | 0.5  | 0.5 |
| 653.4913 | 3.3  | 3.3 | 692.3285 | 0.5  | 0.5  | 751.3924 | 0.8  | 0.8 |
| 653.6909 | 6.8  | 1   | 694.3461 | 3.6  | 3.6  | 753.3152 | 0.6  | 0.6 |
| 653.7891 | 0.5  | 0.5 | 694.8068 | 14.1 | 14.1 | 753.8166 | 0.5  | 0.5 |
| 653.8907 | 7.4  | 1   | 695.3082 | 10.2 | 10.2 | 759.424  | 0.5  | 0.5 |
| 654.091  | 5.5  | 5.5 | 695.3455 | 1.3  | 1.3  | 760.4076 | 2    | 2   |
| 654.2916 | 3.7  | 3.7 | 695.8097 | 4.1  | 4.1  | 761.4003 | 0.8  | 0.8 |
| 654.3689 | 0.6  | 0.6 | 696.3162 | 1.7  | 1.7  | 762.405  | 1.3  | 1.3 |
| 654.4915 | 1.5  | 1.5 | 697.3243 | 0.6  | 0.6  | 763.408  | 0.8  | 0.8 |
| 654.6913 | 0.7  | 0.7 | 700.3406 | 0.8  | 0.8  | 767.8772 | 0.7  | 0.7 |
| 655.2735 | 0.5  | 0.5 | 701.3504 | 0.6  | 0.6  | 768.3836 | 0.8  | 0.8 |
| 657.3064 | 0.7  | 0.7 | 701.4131 | 0.8  | 0.8  | 768.7823 | 0.5  | 0.5 |
| 658.3826 | 0.9  | 0.9 | 702.3701 | 1    | 1    | 769.283  | 0.6  | 0.6 |
| 659.3283 | 1.6  | 1.6 | 703.356  | 8.1  | 1    | 769.3301 | 1    | 1   |
| 659.83   | 1.3  | 1.3 | 704.3614 | 2.9  | 2.9  | 770.3335 | 0.5  | 0.5 |
| 660.333  | 0.6  | 0.6 | 705.3304 | 2.1  | 2.1  | 771.3296 | 0.8  | 0.8 |
| 660.3745 | 0.6  | 0.6 | 705.832  | 1.4  | 1.4  | 771.465  | 0.9  | 0.9 |
| 661.358  | 0.5  | 0.5 | 706.3346 | 0.9  | 0.9  | 771.5789 | 1    | 1   |
| 662.2856 | 0.5  | 0.5 | 707.3447 | 12.4 | 1    | 771.8294 | 1    | 1   |
| 662.3402 | 1.2  | 1.2 | 708.348  | 5    | 5    | 772.0801 | 0.7  | 0.7 |
| 662.7841 | 0.6  | 0.6 | 708.3933 | 0.7  | 0.7  | 772.4494 | 4.3  | 4.3 |
| 663.3196 | 2.4  | 2.4 | 709.3508 | 1.3  | 1.3  | 773.4491 | 2.6  | 2.6 |
| 664.2992 | 18.2 | 1   | 710.377  | 1.7  | 1.7  | 774.3945 | 0.5  | 0.5 |
| 665.3027 | 6.1  | 1   | 710.8781 | 1.2  | 1.2  | 774.4494 | 0.8  | 0.8 |
| 666.3392 | 5.3  | 1   | 711.3783 | 0.6  | 0.6  | 775.3695 | 0.6  | 0.6 |
| 667.3422 | 2.1  | 2.1 | 712.3273 | 1.6  | 1.6  | 775.4233 | 2.3  | 2.3 |
| 668.3429 | 0.6  | 0.6 | 713.3312 | 0.7  | 0.7  | 776.4025 | 3.9  | 3.9 |
| 670.3046 | 1.5  | 1.5 | 716.011  | 0.5  | 0.5  | 777.4048 | 1.5  | 1.5 |
| 670.8058 | 0.9  | 0.9 | 716.3493 | 0.6  | 0.6  | 778.4029 | 0.6  | 0.6 |
| 671.311  | 0.6  | 0.6 | 717.4172 | 0.5  | 0.5  | 781.4012 | 0.6  | 0.6 |
| 672.3352 | 0.6  | 0.6 | 718.0127 | 0.6  | 0.6  | 786.4415 | 0.9  | 0.9 |
| 672.3968 | 0.6  | 0.6 | 718.138  | 0.9  | 0.9  | 787.4383 | 0.6  | 0.6 |
| 673.356  | 1    | 1   | 718.2637 | 0.7  | 0.7  | 788.3593 | 0.7  | 0.7 |
| 673.392  | 0.5  | 0.5 | 718.3877 | 0.6  | 0.6  | 788.861  | 0.6  | 0.6 |
| 675.3352 | 0.9  | 0.9 | 719.6281 | 0.6  | 0.6  | 790.4114 | 0.5  | 0.5 |
| 675.3958 | 0.5  | 0.5 | 719.7709 | 0.6  | 0.6  | 793.3405 | 2.4  | 2.4 |
| 675.832  | 0.7  | 0.7 | 719.9859 | 0.5  | 0.5  | 793.6862 | 1.3  | 1.3 |
| 676.3048 | 0.7  | 0.7 | 720.1299 | 0.9  | 0.9  | 793.8527 | 4.4  | 4.4 |
| 677.3557 | 1.2  | 1.2 | 720.273  | 1.1  | 1.1  | 794.0192 | 7.7  | 1   |
| 678.3095 | 0.5  | 0.5 | 720.4158 | 0.9  | 0.9  | 794.1859 | 8.2  | 1   |
| 678.3559 | 0.6  | 0.6 | 720.5598 | 0.7  | 0.7  | 794.3518 | 7.5  | 1   |
| 679.3711 | 3.4  | 3.4 | 721.2636 | 0.5  | 0.5  | 794.4062 | 0.5  | 0.5 |
| 680.371  | 1.4  | 1.4 | 721.7642 | 0.5  | 0.5  | 794.5196 | 4.5  | 4.5 |
| 680.4431 | 0.7  | 0.7 | 724.3476 | 0.8  | 0.8  | 794.6861 | 2.5  | 2.5 |
| 680.5884 | 1.2  | 1.2 | 726.3432 | 0.5  | 0.5  | 794.8535 | 1.3  | 1.3 |
| 680.7321 | 2    | 2   | 726.85   | 0.5  | 0.5  | 795.0205 | 0.5  | 0.5 |
| 680.8719 | 2.4  | 2.4 | 727.3501 | 0.5  | 0.5  | 795.381  | 14.9 | 1   |
| 681.0174 | 1.8  | 1.8 | 727.8187 | 0.7  | 0.7  | 796.3839 | 6.3  | 1   |
| 681.1609 | 1.2  | 1.2 | 728.3201 | 0.5  | 0.5  | 797.3882 | 1.8  | 1.8 |
| 681.3068 | 0.8  | 0.8 | 729.2759 | 0.5  | 0.5  | 798.3899 | 0.6  | 0.6 |
| 681.3422 | 1.9  | 1.9 | 729.3258 | 0.8  | 0.8  | 800.4557 | 1    | 1   |
| 681.4461 | 0.5  | 0.5 | 729.6095 | 0.5  | 0.5  | 801.4749 | 7.4  | 7.4 |
| 681.8169 | 0.6  | 0.6 | 730.3298 | 0.5  | 0.5  | 802.4785 | 2.9  | 2.9 |
| 682.3052 | 0.7  | 0.7 | 731.4194 | 0.5  | 0.5  | 803.4825 | 0.9  | 0.9 |
| 682.343  | 0.8  | 0.8 | 737.3865 | 1.1  | 1.1  | 804.3811 | 0.9  | 0.9 |
| 684.0774 | 3.2  | 3.2 | 738.3344 | 2.6  | 2.6  | 816.4386 | 10.7 | 1   |
| 684.3279 | 5.1  | 1   | 739.345  | 2.5  | 2.5  | 816.6122 | 1.1  | 1.1 |
| 684.578  | 4.1  | 4.1 | 740.3493 | 0.9  | 0.9  | 816.8619 | 2.2  | 2.2 |
| 684.8285 | 2.3  | 2.3 | 742.3247 | 19.5 | 1    | 817.1116 | 2.3  | 2.3 |
| 685.0792 | 1.1  | 1.1 | 742.3707 | 0.5  | 0.5  | 817.3622 | 2.6  | 2.6 |
| 685.3331 | 0.6  | 0.6 | 742.4502 | 0.7  | 0.7  | 817.4404 | 5.1  | 1   |
| 685.3932 | 2.3  | 2.3 | 742.8262 | 15.2 | 1    | 817.6125 | 1    | 1   |
| 685.4278 | 1.7  | 1.7 | 743.3278 | 6.8  | 1    | 817.8652 | 0.8  | 0.8 |
| 686.3568 | 0.7  | 0.7 | 743.3675 | 0.5  | 0.5  | 818.0112 | 0.5  | 0.5 |

|          |      |      |          |     |     |
|----------|------|------|----------|-----|-----|
| 818.3642 | 0.5  | 0.5  | 880.4179 | 0.7 | 0.7 |
| 818.4423 | 1.9  | 1.9  | 885.4192 | 2.2 | 2.2 |
| 820.1561 | 0.5  | 0.5  | 886.4229 | 1   | 1   |
| 820.2984 | 1    | 1    | 887.4864 | 2.8 | 2.8 |
| 820.4406 | 1.3  | 1.3  | 888.4172 | 0.5 | 0.5 |
| 820.5861 | 1    | 1    | 888.5015 | 2.7 | 2.7 |
| 820.7284 | 1    | 1    | 889.3685 | 0.6 | 0.6 |
| 820.87   | 0.9  | 0.9  | 889.5054 | 1.1 | 1.1 |
| 821.014  | 0.7  | 0.7  | 889.8714 | 0.6 | 0.6 |
| 823.387  | 1.7  | 1.7  | 892.8868 | 0.6 | 0.6 |
| 823.455  | 0.6  | 0.6  | 893.4316 | 0.6 | 0.6 |
| 824.3895 | 0.7  | 0.7  | 903.9727 | 1.2 | 1.2 |
| 825.3926 | 0.7  | 0.7  |          |     |     |
| 835.5074 | 0.5  | 0.5  |          |     |     |
| 838.4209 | 0.8  | 0.8  |          |     |     |
| 839.2318 | 0.6  | 0.6  |          |     |     |
| 839.4038 | 0.7  | 0.7  |          |     |     |
| 839.5655 | 0.7  | 0.7  |          |     |     |
| 839.7321 | 0.5  | 0.5  |          |     |     |
| 840.151  | 0.6  | 0.6  |          |     |     |
| 840.3201 | 0.6  | 0.6  |          |     |     |
| 840.4026 | 0.6  | 0.6  |          |     |     |
| 846.46   | 1.1  | 1.1  |          |     |     |
| 847.4603 | 0.5  | 0.5  |          |     |     |
| 851.4182 | 7.3  | 7.3  |          |     |     |
| 852.4212 | 3.3  | 3.3  |          |     |     |
| 852.8564 | 29.6 | 29.6 |          |     |     |
| 853.3578 | 24.3 | 24.3 |          |     |     |
| 853.4235 | 1    | 1    |          |     |     |
| 853.8593 | 11.8 | 11.8 |          |     |     |
| 854.3609 | 4.4  | 4.4  |          |     |     |
| 854.8614 | 1.3  | 1.3  |          |     |     |
| 855.4859 | 2.5  | 2.5  |          |     |     |
| 856.4894 | 1    | 1    |          |     |     |
| 857.4288 | 0.6  | 0.6  |          |     |     |
| 857.5114 | 3.3  | 3.3  |          |     |     |
| 858.4571 | 0.7  | 0.7  |          |     |     |
| 858.5143 | 1.5  | 1.5  |          |     |     |
| 859.4614 | 0.5  | 0.5  |          |     |     |
| 862.9134 | 9    | 9    |          |     |     |
| 863.4148 | 8.2  | 1    |          |     |     |
| 863.8467 | 1.2  | 1.2  |          |     |     |
| 863.9164 | 4    | 4    |          |     |     |
| 864.3485 | 1.1  | 1.1  |          |     |     |
| 864.4179 | 1.6  | 1.6  |          |     |     |
| 864.8462 | 0.6  | 0.6  |          |     |     |
| 864.9173 | 0.5  | 0.5  |          |     |     |
| 865.9323 | 6.5  | 1    |          |     |     |
| 866.4338 | 6.1  | 1    |          |     |     |
| 866.9345 | 3.2  | 3.2  |          |     |     |
| 67.4358  | 1.2  | 1.2  |          |     |     |
| 869.3523 | 0.6  | 0.6  |          |     |     |
| 871.8298 | 0.8  | 0.8  |          |     |     |
| 872.3318 | 0.7  | 0.7  |          |     |     |
| 873.4003 | 0.6  | 0.6  |          |     |     |
| 873.9039 | 0.7  | 0.7  |          |     |     |
| 874.4047 | 0.8  | 0.8  |          |     |     |
| 875.4107 | 0.6  | 0.6  |          |     |     |
| 875.7476 | 0.6  | 0.6  |          |     |     |
| 876.4103 | 0.5  | 0.5  |          |     |     |
| 876.458  | 0.7  | 0.7  |          |     |     |
| 876.9203 | 1.2  | 1.2  |          |     |     |
| 877.4226 | 1.2  | 1.2  |          |     |     |
| 877.9231 | 0.5  | 0.5  |          |     |     |
| 878.4646 | 1.5  | 1.5  |          |     |     |
| 879.3121 | 0.9  | 0.9  |          |     |     |
| 879.4132 | 1.3  | 1.3  |          |     |     |
| 879.4679 | 0.8  | 0.8  |          |     |     |
| 879.8141 | 0.9  | 0.9  |          |     |     |
| 880.315  | 0.6  | 0.6  |          |     |     |
